# Supplementary material
Source: PubMed Central journal article supplement (PMC2722355)
Supplement: 0905845106_0905845106SI.pdf [file 0905845106_0905845106SI.pdf]

# Supporting Information

CBOL Plant Working Group 10.1073/pnas.0905845106

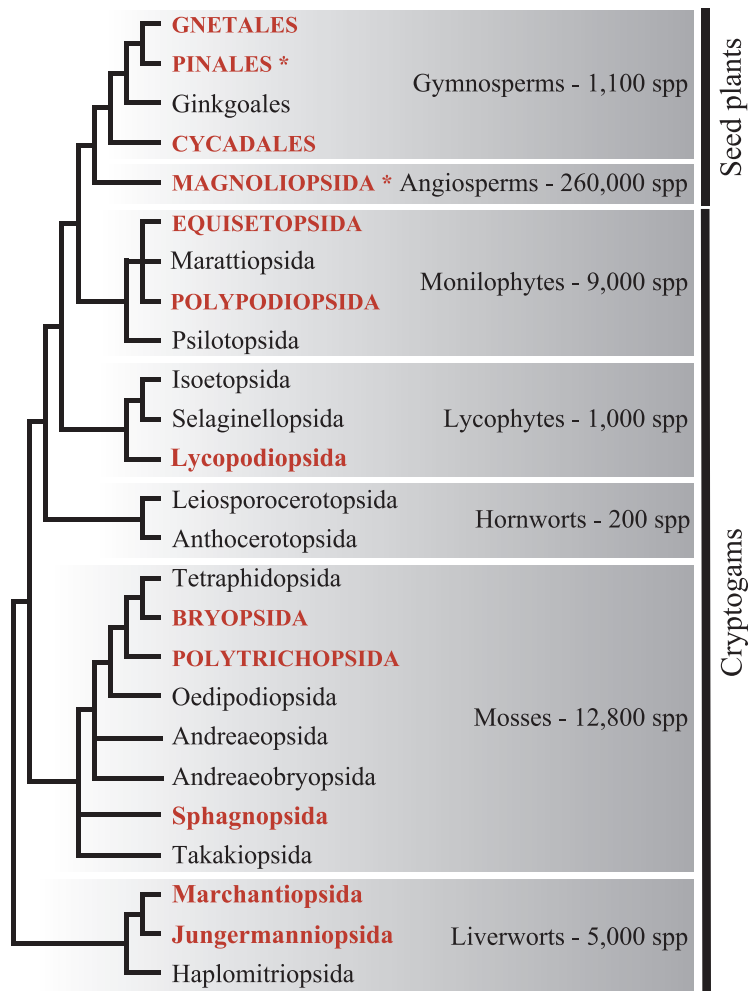

**Fig. S1.** The phylogenetic distribution of land plant samples used in evaluating barcoding loci, with known species richness of major clades indicated. Taxa from the clades in red were represented in the analysis (those in capitals were represented in the Guelph universality sequencing trials), and those clades indicated with an asterisk contain samples that were successfully sequenced for all 7 candidate barcoding loci. The tree topology and taxon numbers are an informal composite summary of the following sources: (1). APG <http://www.mobot.org/MOBOT/research/APweb/welcome.html>; (2). World moss checklist <http://www.mobot.org/MOBOT/tropicos/most/checklist.shtml> (Marshall Crosby, Missouri Botanical Garden) (3). Gymnosperm AToL <http://www.huh.harvard.edu/research/mathews-lab/atolHtmlSite/Why/index.html> (4). <http://bryophytes.plant.siu.edu/general.html>; (5). Crandall-Stotler B, Stotler RE, Long DG (2008) in *Bryophyte Biology*, eds Goffinet B, Shaw AJ (Cambridge University Press, Cambridge), pp 1–54 (6). Goffinet B, Buck WR, Shaw AJ (2008) in *Bryophyte Biology*, eds Goffinet B, Shaw AJ (Cambridge University Press, Cambridge), pp 55–138 (7). Kenrick P, Crane PR (1997) *The origin and early diversification of land plants: A cladistic study*, (Smithsonian Institution Press, Washington DC) (8). Renzaglia KS, et al. (2007) Bryophyte phylogeny: advancing the molecular and morphological frontiers. *The Bryologist* 110:179–213 (9). Smith AR, et al. (2006) A classification for extant ferns. *Taxon* 55:705–731 (10). Qiu Y-L, et al. (2006) The deepest divergences in land plants inferred from phylogenomic evidence. *Proc Natl Acad Sci USA* 103:15511–15516.



## Other Supporting Information Files

[Table S1](#)
