# Supplementary material
Source: PubMed Central journal article supplement (PMC2722355)
Supplement: 0905845106_ST1_PDF.pdf [file 0905845106_ST1_PDF.pdf]

Table S1. Details of samples and accession information for comparative evaluation of 7 candidate plastid DNA barcoding loci

| MAJOR GROUP | Species                     | Voucher details/sample ID  | <i>rpoC1</i> | <i>rpoB</i> | <i>matK</i> | <i>trnH-psbA</i> | <i>rbcL</i> | <i>atpF-atpH</i> | <i>psbK-psbI</i> | Complete (all loci seven loci successfully sequenced) | Samples included in assessments of universality |
|-------------|-----------------------------|----------------------------|--------------|-------------|-------------|------------------|-------------|------------------|------------------|-------------------------------------------------------|-------------------------------------------------|
| Angiosperm  | <i>Acacia exuvialis</i>     | OM260(JRAU)                | EU213940     | EU213603    | EU214205    | EU213781         | EU213435    | -                | EU626889         | no                                                    |                                                 |
| Angiosperm  | <i>Acacia exuvialis</i>     | RL1204 (KNP)               | EU213941     | EU213604    | EU214206    | EU213782         | EU213436    | EU626796         | EU626890         | yes                                                   |                                                 |
| Angiosperm  | <i>Acacia exuvialis</i>     | RL1412(KNP)                | EU213942     | EU213605    | EU214207    | EU213783         | EU213437    | -                | EU626891         | no                                                    |                                                 |
| Angiosperm  | <i>Acacia nigrescens</i>    | RL1111(KNP)                | EU213943     | EU213606    | EU214208    | -                | EU213438    | EU626797         | EU626892         | no                                                    |                                                 |
| Angiosperm  | <i>Acacia nigrescens</i>    | RL1205(KNP)                | EU213944     | EU213607    | EU214209    | EU213784         | EU213439    | EU626798         | EU626893         | yes                                                   |                                                 |
| Angiosperm  | <i>Acacia nigrescens</i>    | RL1656(KNP)                | EU213945     | EU213608    | EU214210    | EU213785         | EU213440    | EU626799         | EU626894         | yes                                                   |                                                 |
| Angiosperm  | <i>Acacia tortilis</i>      | OM261(JRAU)                | EU213948     | EU213611    | EU214213    | EU213788         | EU213443    | EU626800         | EU626895         | yes                                                   |                                                 |
| Angiosperm  | <i>Acacia tortilis</i>      | RL1483(KNP)                | EU213946     | EU213609    | EU214211    | EU213786         | EU213441    | EU626801         | EU626896         | yes                                                   |                                                 |
| Angiosperm  | <i>Acacia tortilis</i>      | RL1608(KNP)                | EU213947     | EU213610    | EU214212    | EU213787         | EU213442    | EU626802         | EU626897         | yes                                                   |                                                 |
| Angiosperm  | <i>Acampe praemorsa</i>     | RBN203(JRAU)               | EU213949     | EU213612    | EU214214    | EU213789         | -           | EU626803         | EU626898         | no                                                    |                                                 |
| Angiosperm  | <i>Acer campestre</i>       | BM000954793 (BM)           | FJ395771     | FJ395642    | FJ395381    | FJ395476         | -           | FJ395282         | NT               | no                                                    |                                                 |
| Angiosperm  | <i>Acer negundo</i>         | AP244 (OAC)                | EU750189     | EU749049    | EU749280    | EU750427         | EU676886    | EU749500         | EU749739         | yes                                                   |                                                 |
| Angiosperm  | <i>Acer negundo</i>         | RBG 017 (OAC)              | EU750190     | EU749050    | EU749281    | EU750428         | EU676887    | EU749501         | EU749740         | yes                                                   |                                                 |
| Angiosperm  | <i>Acer platanoides</i>     | AP367 (OAC)                | EU750192     | EU749052    | EU749283    | EU750430         | EU676889    | EU749503         | EU749742         | yes                                                   |                                                 |
| Angiosperm  | <i>Acer platanoides</i>     | JAG 0346 (OAC)             | EU750191     | EU749051    | EU749282    | EU750429         | EU676888    | EU749502         | EU749741         | yes                                                   |                                                 |
| Angiosperm  | <i>Acer pseudoplatanus</i>  | BM000954752 (BM)           | FJ395816     | FJ395686    | FJ395413    | FJ395512         | FJ395591    | FJ395323         | NT               | no                                                    |                                                 |
| Angiosperm  | <i>Acer rubrum</i>          | JAG 0185 (OAC)             | EU750194     | EU749054    | EU749285    | EU750432         | EU676891    | EU749505         | EU749744         | yes                                                   |                                                 |
| Angiosperm  | <i>Acer rubrum</i>          | JAG 0252 (OAC)             | EU750193     | EU749053    | EU749284    | EU750431         | EU676890    | EU749504         | EU749743         | yes                                                   |                                                 |
| Angiosperm  | <i>Acer rubrum</i>          | JAG 0327 (OAC)             | EU750195     | EU749055    | EU749286    | EU750433         | EU676892    | EU749506         | EU749745         | yes                                                   |                                                 |
| Angiosperm  | <i>Acer saccharinum</i>     | AP387 (OAC)                | EU750198     | EU749058    | -           | EU750436         | EU676895    | EU749509         | EU749748         | no                                                    |                                                 |
| Angiosperm  | <i>Acer saccharinum</i>     | JAG 0324 (OAC)             | EU750196     | EU749056    | EU749287    | EU750434         | EU676893    | EU749507         | EU749746         | yes                                                   |                                                 |
| Angiosperm  | <i>Acer saccharinum</i>     | JAG 0352 (OAC)             | EU750199     | EU749059    | EU749288    | EU750437         | EU676896    | EU749510         | EU749749         | yes                                                   |                                                 |
| Angiosperm  | <i>Acer saccharinum</i>     | JAG 0394 (OAC)             | EU750197     | EU749057    | EU749289    | EU750435         | EU676894    | EU749508         | EU749747         | yes                                                   |                                                 |
| Angiosperm  | <i>Acer saccharum</i>       | AP268 (OAC)                | EU750200     | EU749060    | EU749290    | EU750438         | EU676897    | EU749511         | EU749750         | yes                                                   |                                                 |
| Angiosperm  | <i>Acer saccharum</i>       | JAG 0202 (OAC)             | EU750201     | EU749061    | EU749291    | EU750439         | EU676898    | EU749512         | EU749751         | yes                                                   |                                                 |
| Angiosperm  | <i>Acer saccharum</i>       | JAG 0251 (OAC)             | EU750202     | EU749062    | EU749292    | EU750440         | EU676899    | EU749513         | EU749752         | yes                                                   |                                                 |
| Angiosperm  | <i>Achillea millefolium</i> | BM000954773 (BM)           | FJ395791     | FJ395659    | FJ395393    | FJ395492         | -           | FJ395299         | NT               | no                                                    |                                                 |
| Angiosperm  | <i>Acorus calamus</i>       | Chase 2758 (K)             | GQ248876     | GQ248715    | GQ248071    | GQ248235         | GQ248538    | GQ247894         | GQ248404         | yes                                                   | Angiosperm - Guelph trials                      |
| Angiosperm  | <i>Acorus gramineus</i>     | Chase 18000 (K)            | GQ248877     | GQ248716    | GQ248072    | GQ248236         | GQ248539    | GQ247895         | GQ248405         | yes                                                   | Angiosperm - Guelph trials                      |
| Angiosperm  | <i>Adoxa moschatellina</i>  | BM000954792 (BM)           | FJ395773     | FJ395644    | FJ395383    | FJ395478         | FJ395577    | FJ395284         | NT               | no                                                    |                                                 |
| Angiosperm  | <i>Aglaia korthalsii</i>    | Muellner et al. 2041 (ANM) | GQ248878     | GQ248717    | GQ248073    | GQ248239         | GQ248542    | GQ247898         | GQ248406         | yes                                                   | Angiosperm - Guelph trials                      |
| Angiosperm  | <i>Aglaia odoratissima</i>  | Muellner et al. 2018 (ANM) | GQ248879     | GQ248718    | GQ248074    | GQ248240         | GQ248543    | GQ247899         | GQ248407         | yes                                                   | Angiosperm - Guelph trials                      |
| Angiosperm  | <i>Agrimonia eupatoria</i>  | BM000954753 (BM)           | FJ395810     | FJ395680    | FJ395410    | -                | -           | FJ395318         | NT               | no                                                    |                                                 |
| Angiosperm  | <i>Agrostis capillaris</i>  | BM000954743 (BM)           | FJ395822     | FJ395693    | FJ395420    | FJ395518         | -           | FJ395329         | NT               | no                                                    |                                                 |

|            |                                 |                                 |                    |          |          |                    |          |          |          |     |                            |
|------------|---------------------------------|---------------------------------|--------------------|----------|----------|--------------------|----------|----------|----------|-----|----------------------------|
| Angiosperm | <i>Agrostis vinealis</i>        | FJR; 27713 (BM)                 | FJ395744           | FJ395618 | -        | FJ395454           | -        | FJ395261 | NT       | no  |                            |
| Angiosperm | <i>Alcantarea imperialis</i>    | T. Barbará 10.138               | AM889859           | GQ248719 | AM889687 | -                  | -        | -        | GQ248408 | no  | Angiosperm - Guelph trials |
| Angiosperm | <i>Alcantarea regina</i>        | T. Barbará 1.15                 | GQ248880           | GQ248720 | AM889688 | GQ248241           | GQ248544 | GQ247900 | GQ248409 | yes | Angiosperm - Guelph trials |
| Angiosperm | <i>Alliaria petiolata</i>       | BM000954724 (BM)                | FJ395835           | FJ395704 | -        | FJ395529, FJ395530 | FJ395597 | FJ395340 | NT       | no  |                            |
| Angiosperm | <i>Alopecurus pratensis</i>     | BM000954774 (BM)                | FJ395788, FJ395789 | FJ395657 | FJ395391 | FJ395490           | -        | FJ395297 | NT       | no  |                            |
| Angiosperm | <i>Amaranthus hybridus</i>      | NMNH Killip 40186 (US)          | GQ248881           | GQ248721 | GQ248075 | GQ248242           | GQ248545 | GQ247901 | -        | no  | Angiosperm - Guelph trials |
| Angiosperm | <i>Amaranthus spinosus</i>      | NMNH Wells 4469 (US)            | GQ248882           | GQ248722 | GQ248076 | GQ248243           | GQ248546 | GQ247902 | -        | no  | Angiosperm - Guelph trials |
| Angiosperm | <i>Ambrosia artemisiifolia</i>  | NMNH Wells 4495 (US)            | GQ248883           | GQ248723 | GQ248077 | GQ248244           | GQ248547 | GQ247903 | GQ248410 | yes | Angiosperm - Guelph trials |
| Angiosperm | <i>Ambrosia trifida</i>         | NMNH Wells 30 (US)              | GQ248884           | GQ248724 | GQ248078 | GQ248245           | GQ248548 | GQ247904 | GQ248411 | yes | Angiosperm - Guelph trials |
| Angiosperm | <i>Amorphophallus muelleri</i>  | NMNH-96-216                     | EF590588           | EF590421 | -        | -                  | EF590499 | FJ455767 | -        | no  |                            |
| Angiosperm | <i>Amorphophallus titanum</i>   | NMNH 03-142                     | EF590587           | EF590422 | -        | -                  | EF590500 | FJ455768 | -        | no  |                            |
| Angiosperm | <i>Angelica archangelica</i>    | NMNH Kress 06-8344 (US)         | GQ248885           | EF590423 | GQ248079 | GQ248246           | GQ248549 | GQ247905 | -        | no  | Angiosperm - Guelph trials |
| Angiosperm | <i>Angelica dahurica</i>        | USDA Ames 26545 (US)            | GQ248886           | GQ248725 | GQ248080 | GQ248247           | GQ248550 | GQ247906 | -        | no  | Angiosperm - Guelph trials |
| Angiosperm | <i>Anisantha sterilis</i>       | BM000954713 (BM)                | FJ395836           | FJ395705 | -        | -                  | -        | -        | NT       | no  |                            |
| Angiosperm | <i>Ansellia africana</i>        | OM1163(JRAU)                    | EU213950           | EU213613 | EU214215 | -                  | EU213444 | EU626804 | EU626899 | no  |                            |
| Angiosperm | <i>Ansellia africana</i>        | OM531(JRAU)                     | EU213951           | EU213614 | EU214216 | -                  | EU213445 | EU626805 | EU626900 | no  |                            |
| Angiosperm | <i>Anthoxanthum odoratum</i>    | BM000954783 (BM)                | FJ395779           | FJ395648 | -        | FJ395481           | -        | FJ395289 | NT       | no  |                            |
| Angiosperm | <i>Anthriscus sylvestris</i>    | BM000954785 (BM)                | FJ395772           | FJ395643 | FJ395382 | FJ395477           | FJ395576 | FJ395283 | NT       | no  |                            |
| Angiosperm | <i>Arctium minus</i>            | BM000954760 (BM)                | FJ395803           | FJ395672 | FJ395403 | FJ395501           | -        | FJ395311 | NT       | no  |                            |
| Angiosperm | <i>Aristolochia californica</i> | Chase 19176 (K)                 | GQ248887           | GQ248726 | GQ248081 | GQ248248           | GQ248551 | -        | GQ248412 | no  | Angiosperm - Guelph trials |
| Angiosperm | <i>Aristolochia pistolochia</i> | Chase 9915 (K)                  | GQ248888           | GQ248727 | GQ248082 | GQ248249           | -        | GQ247907 | GQ248413 | no  | Angiosperm - Guelph trials |
| Angiosperm | <i>Arrhenatherum elatius</i>    | BM000954696 (BM)                | FJ395807           | FJ395676 | FJ395406 | FJ395505           | -        | FJ395315 | NT       | no  |                            |
| Angiosperm | <i>Arum maculatum</i>           | BM000954802 (BM)                | FJ395763           | FJ395634 | FJ395376 | FJ395470           | -        | FJ395275 | NT       | no  |                            |
| Angiosperm | <i>Asclepias incarnata</i>      | USBG 04-0205 (US)               | GQ248889           | GQ248728 | GQ248083 | GQ248250           | GQ248552 | GQ247908 | GQ248414 | yes | Angiosperm - Guelph trials |
| Angiosperm | <i>Asclepias tuberosa</i>       | NMNH Kress 06-8174 (US)         | GQ248890           | GQ248729 | GQ248084 | GQ248251           | GQ248553 | GQ247909 | GQ248415 | yes | Angiosperm - Guelph trials |
| Angiosperm | <i>Atriplex patula</i>          | BM000954707 (BM)                | FJ395753           | FJ395625 | FJ395372 | FJ395462           | -        | FJ395268 | NT       | no  |                            |
| Angiosperm | <i>Babiana melanops</i>         | Goldblatt 11421 (NBG)           | GQ248891           | GQ248730 | AM889689 | -                  | -        | -        | -        | no  | Angiosperm - Guelph trials |
| Angiosperm | <i>Babiana torta</i>            | Goldblatt & Manning 11374 (NBG) | GQ248892           | GQ248731 | GQ248085 | GQ248252           | GQ248554 | GQ247910 | GQ248416 | yes | Angiosperm - Guelph trials |
| Angiosperm | <i>Betula alleghaniensis</i>    | AP267 (OAC)                     | EU750203           | EU749063 | EU749293 | EU750441           | EU676900 | -        | EU749753 | no  |                            |

|            |                                  |                                  |          |          |          |          |          |          |          |     |                            |
|------------|----------------------------------|----------------------------------|----------|----------|----------|----------|----------|----------|----------|-----|----------------------------|
| Angiosperm | <i>Betula alleghaniensis</i>     | JAG 0106 (OAC)                   | EU750204 | EU749064 | EU749294 | EU750442 | EU676901 | -        | EU749754 | no  |                            |
| Angiosperm | <i>Betula insignis</i>           | Chase 6148 (K)                   | GQ248893 | GQ248732 | GQ248086 | GQ248253 | GQ248555 | GQ247911 | GQ248417 | yes | Angiosperm - Guelph trials |
| Angiosperm | <i>Betula papyrifera</i>         | AP279 (OAC)                      | EU750205 | EU749065 | EU749295 | EU750443 | EU676902 | -        | EU749755 | no  |                            |
| Angiosperm | <i>Betula papyrifera</i>         | JAG 0175 (OAC)                   | EU750207 | EU749067 | EU749297 | EU750445 | EU676904 | -        | EU749757 | no  |                            |
| Angiosperm | <i>Betula papyrifera</i>         | JAG 0203 (OAC)                   | EU750206 | EU749066 | EU749296 | EU750444 | EU676903 | -        | EU749756 | no  |                            |
| Angiosperm | <i>Betula pendula</i>            | Chase 10289 (K)                  | GQ248894 | GQ248733 | GQ248087 | GQ248254 | GQ248556 | GQ247912 | GQ248418 | yes | Angiosperm - Guelph trials |
| Angiosperm | <i>Bonatea speciosa</i>          | RL1158(KNP)                      | EU213952 | EU213615 | EU214217 | EU213790 | EU213446 | EU626806 | EU626901 | yes |                            |
| Angiosperm | <i>Brachylaena huillensis</i>    | OM1281(JRAU)                     | EU213953 | EU213616 | EU214218 | EU213791 | EU213447 | EU626807 | EU626902 | yes |                            |
| Angiosperm | <i>Brachylaena huillensis</i>    | OM247(JRAU)                      | EU213954 | EU213617 | EU214219 | EU213792 | EU213448 | EU626808 | EU626903 | yes |                            |
| Angiosperm | <i>Brachylaena huillensis</i>    | RBN360(JRAU)                     | EU213955 | EU213618 | EU214220 | EU213793 | EU213449 | EU626809 | EU626904 | yes |                            |
| Angiosperm | <i>Bromopsis ramosus</i>         | BM000954759 (BM)                 | FJ395821 | FJ395692 | FJ395419 | FJ395517 | -        | FJ395328 | NT       | no  |                            |
| Angiosperm | <i>Bromus commutatus</i>         | BM000954745 (BM)                 | FJ395820 | FJ395691 | FJ395418 | FJ395516 | -        | FJ395327 | NT       | no  |                            |
| Angiosperm | <i>Bromus hordeaceus</i>         | Chase 10750 (K)                  | GQ248895 | GQ248734 | GQ248088 | GQ248255 | GQ248557 | GQ247913 | GQ248419 | yes | Angiosperm - Guelph trials |
| Angiosperm | <i>Bromus hordeaceus</i>         | BM000954795 (BM)                 | FJ395769 | FJ395640 | FJ395380 | -        | -        | -        | NT       | no  |                            |
| Angiosperm | <i>Bromus interruptus</i>        | Chase 20653 (K)                  | GQ248896 | GQ248735 | GQ248089 | GQ248256 | GQ248558 | GQ247914 | GQ248420 | yes | Angiosperm - Guelph trials |
| Angiosperm | <i>Calamagrostis divaricata</i>  | NMNH-Peterson&Saarela 21267 (US) | NT*      | NT*      | -        | -        | -        | GQ247915 | GQ248421 | no  | Angiosperm - Guelph trials |
| Angiosperm | <i>Calamagrostis erectifolia</i> | NMNH Kress 06-8362 (US)          | EF590594 | NT*      | -        | GQ248257 | -        | GQ247916 | GQ248422 | no  | Angiosperm - Guelph trials |
| Angiosperm | <i>Calystegia sepium</i>         | BM000954688 (BM)                 | FJ395851 | FJ395721 | FJ395438 | FJ395547 | FJ395604 | FJ395352 | NT       | no  |                            |
| Angiosperm | <i>Canarium acutifolium</i>      | WP2B0501 (US)                    | NT*      | GQ248736 | NT*      | NT*      | NT*      | NT*      | GQ248423 | no  | Angiosperm - Guelph trials |
| Angiosperm | <i>Canarium oleosum</i>          | WP2B0500 (US)                    | GQ248897 | GQ248737 | NT*      | -        | GQ248559 | GQ247917 | GQ248424 | no  | Angiosperm - Guelph trials |
| Angiosperm | <i>Capsella bursa-pastoris</i>   | BM000954763 (BM)                 | FJ395804 | FJ395673 | -        | FJ395502 | FJ395587 | FJ395312 | NT       | no  |                            |
| Angiosperm | <i>Carex cephalophora</i>        | USDA Lea 1483                    | EF590595 | EF590429 | -        | DQ006176 | DQ006089 | -        | -        | no  |                            |
| Angiosperm | <i>Carex lamprocarpa</i>         | Chase 22137 (K)                  | GQ248898 | AM889788 | GQ248090 | GQ248258 | GQ248560 | GQ247918 | -        | no  | Angiosperm - Guelph trials |
| Angiosperm | <i>Carex muricata</i>            | Chase 21014 (K)                  | NT*      | AM889789 | NT*      | -        | GQ248561 | NT*      | -        | no  | Angiosperm - Guelph trials |
| Angiosperm | <i>Carex oligocarpa</i>          | USDA Lea 1481                    | EF590596 | EF590430 | -        | DQ006177 | DQ006090 | -        | -        | no  |                            |
| Angiosperm | <i>Carex sylvatica</i>           | BM000954789 (BM)                 | FJ395776 | -        | -        | -        | -        | FJ395286 | NT       | no  |                            |
| Angiosperm | <i>Carpinus betulus</i>          | BM000954733 (BM)                 | FJ395829 | FJ395698 | -        | FJ395523 | -        | -        | NT       | no  |                            |
| Angiosperm | <i>Castanea sativa</i>           | BM000954761 (BM)                 | FJ395800 | FJ395668 | -        | -        | -        | FJ395308 | NT       | no  |                            |
| Angiosperm | <i>Cattleya aclandiae</i>        | Brieger Collection 32982 (ESA)   | GQ248899 | GQ248738 | GQ248091 | GQ248259 | GQ248562 | GQ247919 | GQ248425 | yes | Angiosperm - Guelph trials |
| Angiosperm | <i>Cattleya nobilior</i>         | Brieger Collection 30978 (ESA)   | GQ248900 | GQ248739 | GQ248092 | GQ248260 | GQ248563 | GQ247920 | GQ248426 | yes | Angiosperm - Guelph trials |
| Angiosperm | <i>Centaurea nigra</i>           | BM000954695 (BM)                 | FJ395806 | FJ395675 | FJ395405 | FJ395504 | -        | FJ395314 | NT       | no  |                            |
| Angiosperm | <i>Centaureum erythraea</i>      | BM000954697 (BM)                 | FJ395738 | FJ395612 | FJ395364 | FJ395452 | FJ395560 | FJ395255 | NT       | no  |                            |
| Angiosperm | <i>Cerastium fontanum</i>        | BM000954797 (BM)                 | FJ395767 | FJ395638 | -        | FJ395474 | FJ395574 | FJ395279 | NT       | no  |                            |
| Angiosperm | <i>Chaerophyllum</i>             | BM000954735 (BM)                 | FJ395826 | FJ395696 | FJ395423 | FJ395521 | FJ395594 | FJ395332 | NT       | no  |                            |

|            |                          |                             |          |          |          |          |          |          |          |     |                            |
|------------|--------------------------|-----------------------------|----------|----------|----------|----------|----------|----------|----------|-----|----------------------------|
|            | temulum                  |                             |          |          |          |          |          |          |          |     |                            |
| Angiosperm | Chamaecrista fasciculata | USDA DLEG 920271 (US)       | GQ248901 | GQ248740 | GQ248093 | GQ248261 | GQ248564 | GQ247921 | GQ248427 | yes | Angiosperm - Guelph trials |
| Angiosperm | Chamaecrista nictitans   | Kress 06-8347 (US)          | GQ248902 | GQ248741 | GQ248094 | GQ248262 | GQ248565 | GQ247922 | GQ248428 | yes | Angiosperm - Guelph trials |
| Angiosperm | Chisocheton ceramicus    | WP2D0378, 2, G12 (US)       | GQ248903 | GQ248742 | GQ248095 | GQ248263 | GQ248566 | GQ247923 | GQ248429 | yes | Angiosperm - Guelph trials |
| Angiosperm | Chisocheton cumingianus  | WP1D0207, 2, D01 (US)       | GQ248904 | GQ248743 | GQ248096 | GQ248264 | GQ248567 | GQ247924 | GQ248430 | yes | Angiosperm - Guelph trials |
| Angiosperm | Cinnamomum camphora      | USDA TARS 4956              | EF590599 | EF590433 | EF590397 | -        | EF590509 | -        | -        | no  |                            |
| Angiosperm | Cinnamomum dictyoneuron  | Lorence Lugas 885 (K)       | GQ248905 | GQ248744 | GQ248097 | GQ248265 | GQ248568 | GQ247925 | GQ248431 | yes | Angiosperm - Guelph trials |
| Angiosperm | Cinnamomum obtusifolium  | TCMK 34 (K)                 | GQ248906 | GQ248745 | GQ248098 | GQ248266 | GQ248569 | GQ247926 | GQ248432 | yes | Angiosperm - Guelph trials |
| Angiosperm | Cinnamomum verum         | USBG 98-2670                | EF590600 | EF590434 | EF590398 | -        | EF590510 | -        | -        | no  |                            |
| Angiosperm | Cirsium arvense          | BM000954731 (BM)            | FJ395834 | FJ395703 | FJ395428 | FJ395528 | -        | FJ395339 | NT       | no  |                            |
| Angiosperm | Citrus aurantium         | USDA PI 128347 (US)         | GQ248907 | GQ248746 | GQ248099 | GQ248267 | GQ248570 | GQ247927 | GQ248433 | yes | Angiosperm - Guelph trials |
| Angiosperm | Citrus reticulata        | USDA PI 109635 (US)         | GQ248908 | GQ248747 | GQ248100 | GQ248268 | GQ248571 | GQ247928 | GQ248434 | yes | Angiosperm - Guelph trials |
| Angiosperm | Clematis vitalba         | BM000954721 (BM)            | FJ395754 | FJ395626 | -        | FJ395463 | -        | FJ395269 | NT       | no  |                            |
| Angiosperm | Coffea mauritiana        | Jaufeally-Fakim 013 (K)     | GQ248909 | GQ248748 | GQ248101 | GQ248269 | GQ248572 | GQ247929 | GQ248435 | yes | Angiosperm - Guelph trials |
| Angiosperm | Coffea myrtifolia        | Jaufeally-Fakim 023 (K)     | GQ248910 | GQ248749 | GQ248102 | GQ248270 | GQ248573 | GQ247930 | GQ248436 | yes | Angiosperm - Guelph trials |
| Angiosperm | Combretum apiculatum     | RL1100(KNP)                 | EU213956 | EU213619 | EU214221 | EU213794 | EU213450 | EU626810 | EU626905 | yes |                            |
| Angiosperm | Combretum apiculatum     | RL1185(KNP)                 | EU213957 | EU213620 | EU214222 | EU213795 | EU213451 | EU626811 | EU626906 | yes |                            |
| Angiosperm | Combretum apiculatum     | RL1355(KNP)                 | EU213958 | EU213621 | EU214223 | EU213796 | EU213452 | EU626812 | EU626907 | yes |                            |
| Angiosperm | Combretum collinum       | OM722(JRAU)                 | EU213959 | EU213622 | EU214224 | EU213797 | EU213453 | EU626813 | EU626908 | yes |                            |
| Angiosperm | Combretum collinum       | RL1164(KNP)                 | EU213960 | EU213623 | EU214225 | EU213798 | EU213454 | EU626814 | EU626909 | yes |                            |
| Angiosperm | Combretum collinum       | RL1392(KNP)                 | EU213961 | EU213624 | EU214226 | EU213799 | EU213455 | EU626815 | EU626910 | yes |                            |
| Angiosperm | Combretum hereroense     | RL1120(KNP)                 | EU213962 | EU213625 | EU214227 | EU213800 | EU213456 | EU626816 | EU626911 | yes |                            |
| Angiosperm | Combretum hereroense     | RL1183(KNP)                 | EU213963 | EU213626 | EU214228 | EU213801 | EU213457 | EU626817 | EU626912 | yes |                            |
| Angiosperm | Combretum hereroense     | RL1364(KNP)                 | EU213964 | EU213627 | EU214229 | EU213802 | EU213458 | EU626818 | EU626913 | yes |                            |
| Angiosperm | Commelina imberbis       | NMNH 05-014 (US)            | GQ248911 | GQ248750 | -        | GQ248271 | GQ248574 | GQ247931 | GQ248437 | no  | Angiosperm - Guelph trials |
| Angiosperm | Commelina purpurea       | NMNH 94-904 (US)            | GQ248912 | GQ248751 | GQ248103 | GQ248272 | GQ248575 | GQ247932 | GQ248438 | yes | Angiosperm - Guelph trials |
| Angiosperm | Conostylis androstemma   | S. Hopper 3/7/96 (UWA)      | GQ248913 | GQ248752 | GQ248104 | GQ248273 | GQ248576 | GQ247933 | GQ248439 | yes | Angiosperm - Guelph trials |
| Angiosperm | Conostylis setigera      | S. Hopper 665/93/1/93 (UWA) | GQ248914 | GQ248753 | GQ248105 | GQ248274 | GQ248577 | GQ247934 | GQ248440 | yes | Angiosperm - Guelph trials |
| Angiosperm | Convolvulus arvensis     | BM000954778 (BM)            | FJ395784 | FJ395653 | FJ395388 | FJ395486 | FJ395582 | FJ395294 | NT       | no  |                            |
| Angiosperm | Cornus alternifolia      | AP053 (OAC)                 | EU750208 | EU749068 | EU749298 | EU750446 | EU676905 | EU749514 | EU749758 | yes |                            |
| Angiosperm | Cornus alternifolia      | JAG 0399 (OAC)              | EU750209 | EU749069 | EU749299 | EU750447 | EU676906 | EU749515 | EU749759 | yes |                            |
| Angiosperm | Cornus racemosa          | JAG 0149 (OAC)              | EU750211 | EU749071 | EU749301 | EU750449 | EU676908 | EU749517 | EU749761 | yes |                            |
| Angiosperm | Cornus racemosa          | JAG 0370 (OAC)              | EU750210 | EU749070 | EU749300 | EU750448 | EU676907 | EU749516 | EU749760 | yes |                            |

|            |                                  |                          |          |          |          |          |          |          |          |     |                            |
|------------|----------------------------------|--------------------------|----------|----------|----------|----------|----------|----------|----------|-----|----------------------------|
| Angiosperm | <i>Cornus rugosa</i>             | AP265 (OAC)              | EU750212 | EU749072 | EU749302 | EU750450 | EU676909 | EU749518 | EU749762 | yes |                            |
| Angiosperm | <i>Cornus rugosa</i>             | JAG 0222 (OAC)           | EU750213 | EU749073 | EU749303 | EU750451 | EU676910 | EU749519 | EU749763 | yes |                            |
| Angiosperm | <i>Cornus sanguinea</i>          | BM000954748 (BM)         | FJ395811 | FJ395681 | FJ395411 | FJ395509 | FJ395589 | FJ395319 | NT       | no  |                            |
| Angiosperm | <i>Cornus stolonifera</i>        | AP094 (OAC)              | EU750214 | EU749074 | EU749304 | EU750452 | EU676911 | EU749520 | EU749764 | yes |                            |
| Angiosperm | <i>Cornus stolonifera</i>        | AP231 (OAC)              | EU750217 | EU749077 | EU749307 | EU750455 | EU676914 | EU749523 | EU749767 | yes |                            |
| Angiosperm | <i>Cornus stolonifera</i>        | JAG 0267 (OAC)           | EU750215 | EU749075 | EU749305 | EU750453 | EU676912 | EU749521 | EU749765 | yes |                            |
| Angiosperm | <i>Cornus stolonifera</i>        | JAG 0343 (OAC)           | EU750216 | EU749076 | EU749306 | EU750454 | EU676913 | EU749522 | EU749766 | yes |                            |
| Angiosperm | <i>Corylus avellana</i>          | BM000954734 (BM)         | FJ395828 | -        | -        | -        | -        | -        | NT       | no  |                            |
| Angiosperm | <i>Crataegus laevigata</i>       | BM000954692 (BM)         | FJ395756 | FJ395628 | -        | -        | -        | -        | NT       | no  |                            |
| Angiosperm | <i>Crataegus monogyna</i>        | BM000954787 (BM)         | FJ395781 | FJ395650 | FJ395386 | FJ395483 | -        | FJ395291 | NT       | no  |                            |
| Angiosperm | <i>Crepis capillaris</i>         | BM000954692 (BM)         | -        | -        | FJ395373 | FJ395464 | -        | -        | NT       | no  |                            |
| Angiosperm | <i>Crepis</i> sp.                | BM000954771 (BM)         | FJ395793 | FJ395661 | FJ395396 | FJ395495 | FJ395584 | FJ395302 | NT       | no  |                            |
| Angiosperm | <i>Croton gratissimus</i>        | OM785(JRAU)              | EU213965 | EU213628 | EU214230 | EU213803 | EU213459 | EU626819 | EU626914 | yes |                            |
| Angiosperm | <i>Croton gratissimus</i>        | RL1619(KNP)              | EU213966 | EU213629 | EU214231 | EU213804 | EU213460 | EU626820 | EU626915 | yes |                            |
| Angiosperm | <i>Croton gratissimus</i>        | RL1621(KNP)              | EU213967 | EU213630 | EU214232 | EU213805 | EU213461 | EU626821 | EU626916 | yes |                            |
| Angiosperm | <i>Croton megalobotrys</i>       | OM774(JRAU)              | EU213968 | EU213631 | EU214233 | EU213806 | EU213462 | EU626822 | EU626917 | yes |                            |
| Angiosperm | <i>Croton megalobotrys</i>       | RL1540(KNP)              | EU213969 | EU213632 | EU214234 | EU213807 | EU213463 | EU626823 | EU626918 | yes |                            |
| Angiosperm | <i>Croton megalobotrys</i>       | RL1574(KNP)              | EU213970 | EU213633 | EU214235 | EU213808 | EU213464 | EU626824 | EU626919 | yes |                            |
| Angiosperm | <i>Croton pseudopulchellus</i>   | RBN186(JRAU)             | EU213971 | EU213634 | EU214236 | EU213809 | EU213465 | -        | EU626920 | no  |                            |
| Angiosperm | <i>Croton pseudopulchellus</i>   | RBN262(JRAU)             | EU213972 | EU213635 | EU214237 | EU213810 | EU213466 | -        | EU626921 | no  |                            |
| Angiosperm | <i>Croton pseudopulchellus</i>   | RL1650(KNP)              | EU213973 | EU213636 | EU214238 | EU213811 | EU213467 | -        | EU626922 | no  |                            |
| Angiosperm | <i>Cryptocarya alba</i>          | Chase 5521 (K)           | GQ248915 | GQ248754 | GQ248106 | GQ248275 | GQ248578 | GQ247935 | GQ248441 | yes | Angiosperm - Guelph trials |
| Angiosperm | <i>Cryptocarya caloneura</i>     | WP2B0417 (US)            | GQ248916 | GQ248755 | GQ248107 | GQ248276 | GQ248579 | GQ247936 | GQ248442 | yes | Angiosperm - Guelph trials |
| Angiosperm | <i>Cryptocarya mackinnoniana</i> | WP2B0550 (US)            | GQ248917 | GQ248756 | GQ248108 | GQ248277 | GQ248580 | GQ247937 | GQ248443 | yes | Angiosperm - Guelph trials |
| Angiosperm | <i>Cryptocarya triplinervis</i>  | Chase 5522 (K)           | GQ248918 | GQ248757 | GQ248109 | GQ248278 | GQ248581 | GQ247938 | GQ248444 | yes | Angiosperm - Guelph trials |
| Angiosperm | <i>Curcuma attenuata</i>         | NMNH 99-127 (US)         | GQ248919 | GQ248758 | GQ248110 | GQ248279 | GQ248582 | GQ247939 | GQ248445 | yes | Angiosperm - Guelph trials |
| Angiosperm | <i>Curcuma cochinchinensis</i>   | NMNH 96-207 (US)         | GQ248920 | GQ248759 | GQ248111 | GQ248280 | GQ248583 | GQ247940 | GQ248446 | yes | Angiosperm - Guelph trials |
| Angiosperm | <i>Cypripedium calceolus</i>     | M.F.Fay O-1115           | GQ248921 | GQ248760 | GQ248112 | GQ248281 | GQ248584 | GQ247941 | GQ248447 | yes | Angiosperm - Guelph trials |
| Angiosperm | <i>Cypripedium henryi</i>        | Chase O-955 (K)          | AM889880 | AM889797 | AM889704 | NT       | NT       | NT       | NT       | no  |                            |
| Angiosperm | <i>Cypripedium micranthos</i>    | P. Corkhill 164.19       | GQ248922 | GQ248761 | GQ248113 | GQ248282 | GQ248585 | GQ247942 | GQ248448 | yes | Angiosperm - Guelph trials |
| Angiosperm | <i>Dactylis glomerata</i>        | BM000954758 (BM)         | FJ395790 | FJ395658 | FJ395392 | FJ395491 | -        | FJ395298 | NT       | no  |                            |
| Angiosperm | <i>Dactylorhiza foliosa</i>      | R. Bateman 609 (Bateman) | GQ248923 | GQ248762 | GQ248114 | GQ248283 | GQ248586 | GQ247943 | GQ248449 | yes | Angiosperm - Guelph trials |
| Angiosperm | <i>Dactylorhiza maculata</i>     | MH97215 (LD)             | GQ248924 | GQ248763 | GQ248115 | GQ248284 | GQ248587 | GQ247944 | GQ248450 | yes | Angiosperm - Guelph trials |

|            |                                  |                         |          |          |          |          |          |                    |          |     |                            |
|------------|----------------------------------|-------------------------|----------|----------|----------|----------|----------|--------------------|----------|-----|----------------------------|
| Angiosperm | <i>Datura innoxia</i>            | NMNH 06-8150 (US)       | GQ273985 | GQ273984 | GQ274313 | GQ274314 | GQ274316 | GQ274310           | GQ335519 | yes | Angiosperm - Guelph trials |
| Angiosperm | <i>Datura stramonium</i>         | USBG 06-0525 (US)       | GQ248925 | GQ248764 | GQ248116 | GQ248285 | GQ248588 | GQ247945           | GQ248451 | yes | Angiosperm - Guelph trials |
| Angiosperm | <i>Daucus carota</i>             | FJR; 27732 (BM)         | FJ395759 | -        | FJ395374 | FJ395467 | FJ395569 | FJ395272, FJ395273 | NT       | no  |                            |
| Angiosperm | <i>Dendrobium lindleyi</i>       | USBG 99-2351 (US)       | GQ248926 | GQ248765 | GQ248117 | GQ248286 | GQ248589 | GQ247946           | GQ248452 | yes | Angiosperm - Guelph trials |
| Angiosperm | <i>Dendrobium nobile</i>         | USBG 97-0141 (US)       | GQ248927 | GQ248766 | GQ248118 | GQ248287 | GQ248590 | GQ247947           | -        | no  | Angiosperm - Guelph trials |
| Angiosperm | <i>Deschampsia cespitosa</i>     | BM000954757 (BM)        | -        | FJ395670 | FJ395402 | FJ395500 | -        | FJ395310           | NT       | no  |                            |
| Angiosperm | <i>Dioscorea bulbifera</i>       | Chase 15071 (K)         | GQ248928 | GQ248767 | GQ248119 | GQ248290 | GQ248593 | GQ247950           | GQ248453 | yes | Angiosperm - Guelph trials |
| Angiosperm | <i>Dioscorea bulbifera</i>       | USBG 94-0618            | EF590611 | EF590445 | -        | EF590691 | EF590523 | FJ455769           | -        | no  |                            |
| Angiosperm | <i>Dioscorea schimperiana</i>    | Chase 22295 (K)         | GQ248929 | GQ248768 | GQ248120 | GQ248291 | GQ248594 | GQ247951           | GQ248454 | yes | Angiosperm - Guelph trials |
| Angiosperm | <i>Dioscorea villosa</i>         | NMNH Beyersdorfer 81    | EF590612 | EF590446 | -        | DQ006179 | DQ006092 | -                  | -        | no  |                            |
| Angiosperm | <i>Diospyros bejaudii</i>        | Duangjai, S. 76 (WU)    | GQ248930 | GQ248769 | GQ248121 | GQ248292 | GQ248595 | GQ247952           | GQ248455 | yes | Angiosperm - Guelph trials |
| Angiosperm | <i>Diospyros transitoria</i>     | Duangjai, S. 170 (WU)   | GQ248931 | GQ248770 | GQ248122 | GQ248293 | GQ248596 | GQ247953           | GQ248456 | yes | Angiosperm - Guelph trials |
| Angiosperm | <i>Elaeocarpus alternifolius</i> | WP1B0080 (US)           | GQ248932 | GQ248771 | -        | -        | -        | GQ247954           | GQ248457 | no  | Angiosperm - Guelph trials |
| Angiosperm | <i>Elaeocarpus undulatus</i>     | WP1A0031 (US)           | GQ248933 | GQ248772 | -        | -        | GQ248597 | GQ247955           | GQ248458 | no  | Angiosperm - Guelph trials |
| Angiosperm | <i>Elytrigia repens</i>          | BM000954744 (BM)        | FJ395823 | FJ395694 | FJ395421 | FJ395519 | -        | FJ395330           | NT       | no  |                            |
| Angiosperm | <i>Epilobium hirsutum</i>        | BM000954674 (BM)        | FJ395758 | FJ395630 | -        | -        | FJ395568 | FJ395271           | NT       | no  |                            |
| Angiosperm | <i>Epilobium montanum</i>        | BM000954726 (BM)        | FJ395742 | FJ395616 | -        | -        | FJ395563 | FJ395259           | NT       | no  |                            |
| Angiosperm | <i>Epilobium parviflorum</i>     | BM000954727 (BM)        | FJ395739 | FJ395613 | -        | -        | FJ395561 | FJ395256           | NT       | no  |                            |
| Angiosperm | <i>Epilobium tetragonum</i>      | BM000954725 (BM)        | FJ395733 | -        | -        | -        | FJ395557 | FJ395248           | NT       | no  |                            |
| Angiosperm | <i>Eragrostis pectinacea</i>     | Kress 06-8361 (US)      | EF590615 | GQ248773 | -        | GQ248299 | GQ248602 | FJ455770           | GQ248459 | no  | Angiosperm - Guelph trials |
| Angiosperm | <i>Eragrostis tenuifolia</i>     | Kress 06-8363 (US)      | EF590616 | GQ248774 | GQ248123 | GQ248300 | GQ248603 | GQ247960           | -        | no  | Angiosperm - Guelph trials |
| Angiosperm | <i>Erica anguliger</i>           | Oliver, T., 11373 (NBG) | GQ248937 | GQ248775 | GQ248124 | GQ248301 | GQ248604 | GQ247961           | GQ248460 | yes | Angiosperm - Guelph trials |
| Angiosperm | <i>Erica bocquetii</i>           | Chase 20076 (K)         | AM889887 | AM889802 | AM889709 | NT       | NT       | NT                 | NT       | no  |                            |
| Angiosperm | <i>Erica discolor</i>            | Chase 23743 (K)         | GQ248938 | GQ248776 | GQ248125 | GQ248302 | GQ248605 | GQ247962           | GQ248461 | yes | Angiosperm - Guelph trials |
| Angiosperm | <i>Erica discolor</i>            | Chase 17940 (K)         | AM889888 | AM889803 | AM889710 | NT       | NT       | NT                 | NT       | no  |                            |
| Angiosperm | <i>Erigeron annuus</i>           | AP168 (OAC)             | EU750220 | EU749080 | EU749310 | EU750458 | EU676917 | EU749526           | EU749770 | yes |                            |
| Angiosperm | <i>Erigeron annuus</i>           | JAG 0162 (OAC)          | EU750219 | EU749079 | EU749309 | EU750457 | EU676916 | EU749525           | EU749769 | yes |                            |
| Angiosperm | <i>Erigeron annuus</i>           | JAG 0208 (OAC)          | EU750218 | EU749078 | EU749308 | EU750456 | EU676915 | EU749524           | EU749768 | yes |                            |
| Angiosperm | <i>Erigeron strigosus</i>        | AP195 (OAC)             | EU750221 | EU749081 | EU749311 | EU750459 | EU676918 | EU749527           | EU749771 | yes |                            |
| Angiosperm | <i>Erigeron strigosus</i>        | JAG 0080 (OAC)          | EU750224 | EU749084 | EU749314 | EU750462 | EU676921 | EU749530           | EU749774 | yes |                            |
| Angiosperm | <i>Erigeron strigosus</i>        | JAG 0210 (OAC)          | EU750223 | EU749083 | EU749313 | EU750461 | EU676920 | EU749529           | EU749773 | yes |                            |

|            |                               |                   |          |          |          |          |          |                       |          |     |                            |
|------------|-------------------------------|-------------------|----------|----------|----------|----------|----------|-----------------------|----------|-----|----------------------------|
| Angiosperm | <i>Erigeron strigosus</i>     | JAG 0268 (OAC)    | EU750222 | EU749082 | EU749312 | EU750460 | EU676919 | EU749528              | EU749772 | yes |                            |
| Angiosperm | <i>Eucalyptus globulus</i>    | NMNH 06-8348 (US) | GQ248939 | GQ248777 | GQ248126 | GQ248303 | GQ248606 | GQ247963              | GQ248462 | yes | Angiosperm - Guelph trials |
| Angiosperm | <i>Eucalyptus melliodora</i>  | NMNH 06-8349 (US) | GQ248940 | GQ248778 | GQ248127 | GQ248304 | GQ248607 | GQ247964              | GQ248463 | yes | Angiosperm - Guelph trials |
| Angiosperm | <i>Eulophia</i> sp.           | OM473(KNP))       | EU213974 | EU213637 | EU214239 | EU213812 | EU213468 | EU626827              | EU626923 | yes |                            |
| Angiosperm | <i>Eupatorium maculatum</i>   | AP253 (OAC)       | EU750225 | EU749085 | EU749315 | EU750463 | EU676922 | EU749531              | EU749775 | yes |                            |
| Angiosperm | <i>Eupatorium maculatum</i>   | RBG 005 (OAC)     | EU750226 | EU749086 | EU749316 | EU750464 | EU676923 | EU749532              | EU749776 | yes |                            |
| Angiosperm | <i>Eupatorium perfoliatum</i> | AP254 (OAC)       | EU750227 | EU749087 | EU749317 | EU750465 | EU676924 | EU749533              | EU749777 | yes |                            |
| Angiosperm | <i>Eupatorium perfoliatum</i> | JAG 0045 (OAC)    | EU750228 | EU749088 | EU749318 | EU750466 | EU676925 | EU749534              | EU749778 | yes |                            |
| Angiosperm | <i>Fagus sylvatica</i>        | BM000954762 (BM)  | FJ395802 | FJ395671 | -        | -        | -        | -                     | NT       | no  |                            |
| Angiosperm | <i>Faurea rochetiana</i>      | OM1413(JRAU)      | EU213975 | EU213638 | EU214240 | EU213813 | EU213469 | EU626828              | EU626924 | yes |                            |
| Angiosperm | <i>Faurea rochetiana</i>      | OM1461(KNP)       | EU213976 | EU213639 | EU214241 | EU213814 | EU213470 | EU626829              | EU626925 | yes |                            |
| Angiosperm | <i>Faurea rochetiana</i>      | OM1463(KNP)       | EU213977 | EU213640 | EU214242 | EU213815 | EU213471 | EU626830              | EU626926 | yes |                            |
| Angiosperm | <i>Faurea saligna</i>         | OM1438(JRAU)      | EU213978 | EU213641 | EU214243 | EU213816 | EU213472 | EU626831              | EU626927 | yes |                            |
| Angiosperm | <i>Faurea saligna</i>         | OM1443(KNP)       | EU213979 | EU213642 | EU214244 | EU213817 | EU213473 | EU626832              | EU626928 | yes |                            |
| Angiosperm | <i>Faurea saligna</i>         | OM1445(KNP)       | EU213980 | EU213643 | EU214245 | EU213818 | EU213474 | EU626833              | EU626929 | yes |                            |
| Angiosperm | <i>Festuca ovina</i>          | BM000954769 (BM)  | FJ395795 | FJ395663 | FJ395397 | FJ395496 | -        | FJ395303              | NT       | no  |                            |
| Angiosperm | <i>Festuca rubra</i>          | BM000954755 (BM)  | -        | -        | FJ395395 | FJ395494 | -        | FJ395301              | NT       | no  |                            |
| Angiosperm | <i>Ficus abutilifolia</i>     | OM557(JRAU)       | EU213983 | EU213646 | EU214248 | EU213821 | EU213477 | EU626835              | EU626931 | yes |                            |
| Angiosperm | <i>Ficus abutilifolia</i>     | RL1471(KNP)       | EU213981 | EU213644 | EU214246 | EU213819 | EU213475 | EU626836              | EU626932 | yes |                            |
| Angiosperm | <i>Ficus abutilifolia</i>     | RL1501(KNP)       | EU213982 | EU213645 | EU214247 | EU213820 | EU213476 | EU626837              | EU626933 | yes |                            |
| Angiosperm | <i>Ficus bernaysii</i>        | WP2A0440 (US)     | GQ248941 | GQ248779 | GQ248128 | GQ248305 | GQ248608 | GQ247965              | GQ248464 | yes | Angiosperm - Guelph trials |
| Angiosperm | <i>Ficus erythrosperma</i>    | WP1B0058 (US)     | GQ248942 | GQ248780 | GQ248129 | GQ248306 | GQ248609 | GQ247966              | GQ248465 | yes | Angiosperm - Guelph trials |
| Angiosperm | <i>Ficus glumosa</i>          | OM564(JRAU)       | EU213984 | EU213647 | EU214249 | EU213822 | EU213478 | EU626838              | EU626934 | yes |                            |
| Angiosperm | <i>Ficus glumosa</i>          | RL1407(KNP)       | EU213985 | EU213648 | EU214250 | EU213823 | EU213479 | EU626839              | EU626935 | yes |                            |
| Angiosperm | <i>Ficus glumosa</i>          | RL1429(KNP)       | EU213986 | EU213649 | EU214251 | EU213824 | EU213480 | EU626840              | -        | no  |                            |
| Angiosperm | <i>Ficus sycomorus</i>        | RBN197(JRAU)      | EU213987 | EU213650 | EU214252 | EU213825 | EU213481 | EU626841              | EU626936 | yes |                            |
| Angiosperm | <i>Ficus sycomorus</i>        | RL1598(KNP)       | EU213988 | EU213651 | EU214253 | EU213826 | EU213482 | EU626842              | EU626937 | yes |                            |
| Angiosperm | <i>Ficus sycomorus</i>        | RL1614(KNP)       | EU213989 | EU213652 | EU214254 | EU213827 | EU213483 | EU626843              | EU626938 | yes |                            |
| Angiosperm | <i>Fragaria vesca</i>         | BM000954672 (BM)  | FJ395755 | FJ395627 | NT       | FJ395465 | -        | -                     | NT       | no  |                            |
| Angiosperm | <i>Fraxinus excelsior</i>     | BM000954747 (BM)  | FJ395817 | FJ395687 | FJ395414 | FJ395513 | FJ395592 | FJ395324              | NT       | no  |                            |
| Angiosperm | <i>Fritillaria affinis</i>    | Chase 446 (K)     | GQ248943 | GQ248781 | NT*      | GQ248307 | GQ248610 | GQ247967              | -        | no  | Angiosperm - Guelph trials |
| Angiosperm | <i>Fritillaria micrantha</i>  | Chase 15953 (K)   | GQ248944 | GQ248782 | NT*      | GQ248308 | GQ248611 | GQ247968              | -        | no  | Angiosperm - Guelph trials |
| Angiosperm | <i>Galium mollugo</i>         | BM000954741 (BM)  | FJ395819 | FJ395690 | FJ395417 | FJ395515 | FJ395593 | FJ395326              | NT       | no  |                            |
| Angiosperm | <i>Geranium dissectum</i>     | BM000954756 (BM)  | FJ395799 | FJ395667 | FJ395400 | -        | -        | FJ395307              | NT       | no  |                            |
| Angiosperm | <i>Geranium molle</i>         | BM000954706 (BM)  | -        | -        | FJ395361 | -        | -        | FJ395251              | NT       | no  |                            |
| Angiosperm | <i>Geranium robertianum</i>   | BM000954764 (BM)  | FJ395801 | FJ395669 | FJ395401 | -        | -        | FJ395309              | NT       | no  |                            |
| Angiosperm | <i>Geum urbanum</i>           | BM000954767 (BM)  | FJ395798 | FJ395666 | -        | FJ395499 | -        | FJ395306              | NT       | no  |                            |
| Angiosperm | <i>Glechoma hederacea</i>     | BM000954732 (BM)  | FJ395830 | FJ395699 | FJ395424 | FJ395524 | -        | FJ395334,<br>FJ395335 | NT       | no  |                            |
| Angiosperm | <i>Grewia bicolor</i>         | OM329(JRAU)       | EU213990 | EU213653 | EU214255 | EU213828 | EU213484 | EU626843              | EU626938 | yes |                            |

|            |                                  |                    |          |          |          |          |          |                       |          |     |                            |
|------------|----------------------------------|--------------------|----------|----------|----------|----------|----------|-----------------------|----------|-----|----------------------------|
| Angiosperm | <i>Grewia bicolor</i>            | RL1545(KNP)        | EU213991 | EU213654 | EU214256 | EU213829 | EU213485 | EU626844              | EU626939 | yes |                            |
| Angiosperm | <i>Grewia bicolor</i>            | RL1658(KNP)        | EU213992 | EU213655 | EU214257 | EU213830 | EU213486 | EU626845              | EU626940 | yes |                            |
| Angiosperm | <i>Grewia flavescens</i>         | OM323(JRAU)        | EU213993 | EU213656 | EU214258 | EU213831 | EU213487 | -                     | EU626941 | no  |                            |
| Angiosperm | <i>Grewia flavescens</i>         | RL1472(KNP)        | EU213994 | EU213657 | EU214259 | EU213832 | EU213488 | -                     | EU626942 | no  |                            |
| Angiosperm | <i>Grewia flavescens</i>         | RL1604(KNP)        | EU213995 | EU213658 | EU214260 | -        | -        | -                     | -        | no  |                            |
| Angiosperm | <i>Grewia villosa</i>            | RL1342(KNP)        | EU213996 | EU213659 | EU214261 | EU213833 | EU213489 | -                     | EU626943 | no  |                            |
| Angiosperm | <i>Grewia villosa</i>            | RL1523(KNP)        | EU213997 | EU213660 | EU214262 | EU213834 | EU213490 | -                     | EU626944 | no  |                            |
| Angiosperm | <i>Grewia villosa</i>            | RL1569(KNP)        | EU213998 | EU213661 | EU214263 | EU213835 | EU213491 | -                     | EU626945 | no  |                            |
| Angiosperm | <i>Harpullia arborea</i>         | WP2B0407 (US)      | GQ248945 | GQ248783 | GQ248130 | GQ248309 | GQ248612 | GQ247969              | GQ248466 | yes | Angiosperm - Guelph trials |
| Angiosperm | <i>Harpullia longipetala</i>     | WP2B0487 (US)      | GQ248946 | GQ248784 | GQ248131 | GQ248310 | GQ248613 | GQ247970              | GQ248467 | yes | Angiosperm - Guelph trials |
| Angiosperm | <i>Hedera helix</i>              | BM000954675 (BM)   | FJ395737 | -        | FJ395363 | FJ395451 | FJ395559 | FJ395253,<br>FJ395254 | NT       | no  |                            |
| Angiosperm | <i>Heliconia bihai</i>           | NMNH RY50 (US)     | GQ248947 | GQ248785 | GQ248132 | GQ248311 | GQ248614 | GQ247971              | -        | no  | Angiosperm - Guelph trials |
| Angiosperm | <i>Heliconia caribaea</i>        | Kress 04-7533 (US) | GQ248948 | GQ248786 | GQ248133 | GQ248312 | GQ248615 | GQ247972              | -        | no  | Angiosperm - Guelph trials |
| Angiosperm | <i>Helleborus atrorubens</i>     | Chase 17792 (K)    | GQ248949 | GQ248787 | GQ248134 | GQ248313 | GQ248616 | GQ247973              | GQ248468 | yes | Angiosperm - Guelph trials |
| Angiosperm | <i>Helleborus croaticus</i>      | Chase 9418 (K)     | GQ248950 | GQ248788 | -        | GQ248314 | GQ248617 | GQ247974              | GQ248469 | no  | Angiosperm - Guelph trials |
| Angiosperm | <i>Heracleum sphondylium</i>     | BM000954765 (BM)   | FJ395796 | FJ395664 | FJ395398 | FJ395497 | FJ395586 | FJ395304              | NT       | no  |                            |
| Angiosperm | <i>Heteromorpha arborescens</i>  | OM1430(JRAU)       | EU213999 | EU213662 | EU214264 | EU213836 | EU213492 | EU626848              | EU626946 | yes |                            |
| Angiosperm | <i>Heteromorpha arborescens</i>  | OM1488(JRAU)       | EU214000 | EU213663 | EU214265 | EU213837 | EU213493 | EU626849              | EU626947 | yes |                            |
| Angiosperm | <i>Heteromorpha arborescens</i>  | OM1516(KNP)        | EU214001 | EU213664 | EU214266 | EU213838 | EU213494 | EU626850              | EU626948 | yes |                            |
| Angiosperm | <i>Holcus lanatus</i>            | BM000954772 (BM)   | FJ395792 | FJ395660 | FJ395394 | FJ395493 | -        | FJ395300              | NT       | no  |                            |
| Angiosperm | <i>Horsfieldia basifissa</i>     | WP1A0012 (US)      | GQ248951 | GQ248789 | GQ248135 | GQ248315 | GQ248618 | GQ247975              | GQ248470 | yes | Angiosperm - Guelph trials |
| Angiosperm | <i>Horsfieldia hellwigii</i>     | WP1C0125 (US)      | GQ248952 | GQ248790 | -        | GQ248316 | GQ248619 | GQ247976              | GQ248471 | no  | Angiosperm - Guelph trials |
| Angiosperm | <i>Howea belmoreana</i>          | Baker 1155 (K)     | GQ248953 | GQ248791 | GQ248136 | GQ248317 | GQ248620 | GQ247977              | GQ248472 | yes | Angiosperm - Guelph trials |
| Angiosperm | <i>Howea forsteriana</i>         | Baker 1156 (K)     | AM889896 | AM889811 | AM889716 | FJ461352 | NT       | FJ461351              | NT       | no  |                            |
| Angiosperm | <i>Howea forsteriana</i>         | Baker 1157 (K)     | GQ248954 | GQ248792 | GQ248137 | GQ248318 | GQ248621 | GQ247978              | GQ248473 | yes | Angiosperm - Guelph trials |
| Angiosperm | <i>Hyacinthoides non-scripta</i> | BM000954788 (BM)   | FJ395777 | FJ395646 | -        | -        | FJ395578 | FJ395287              | NT       | no  |                            |
| Angiosperm | <i>Hydnora johannis</i>          | OM534(JRAU)        | EU214002 | -        | -        | -        | -        | -                     | -        | no  |                            |
| Angiosperm | <i>Hydrangea macrophylla</i>     | Kress 06-8351 (US) | GQ248955 | GQ248793 | GQ248138 | GQ248319 | GQ248622 | GQ247979              | GQ248474 | yes | Angiosperm - Guelph trials |
| Angiosperm | <i>Hydrangea xanthoneura</i>     | Kress 06-8350 (US) | GQ248956 | GQ248794 | GQ248139 | GQ248320 | GQ248623 | GQ247980              | GQ248475 | yes | Angiosperm - Guelph trials |
| Angiosperm | <i>Hypericum perforatum</i>      | BM000954770 (BM)   | FJ395794 | FJ395662 | -        | -        | FJ395585 | -                     | NT       | no  |                            |



|            |                             |                                          |          |          |          |          |          |          |          |     |                            |
|------------|-----------------------------|------------------------------------------|----------|----------|----------|----------|----------|----------|----------|-----|----------------------------|
| Angiosperm | <i>Hyphaene coriacea</i>    | OM1184(JRAU)                             | EU214003 | EU213666 | EU214268 | EU213775 | EU213495 | EU626851 | EU626950 | yes |                            |
| Angiosperm | <i>Hyphaene coriacea</i>    | OM1187(JRAU)                             | EU214004 | EU213667 | EU214269 | EU213776 | EU213496 | EU626852 | EU626951 | yes |                            |
| Angiosperm | <i>Hyphaene coriacea</i>    | OM236(JRAU)                              | EU214006 | EU213669 | EU214271 | EU213778 | EU213498 | EU626853 | EU626952 | yes |                            |
| Angiosperm | <i>Hyphaene coriacea</i>    | OM755(JRAU)                              | EU214005 | EU213668 | EU214270 | EU213777 | EU213497 | EU626854 | EU626953 | yes |                            |
| Angiosperm | <i>Hyphaene petersiana</i>  | OM1296(JRAU)                             | EU214007 | EU213670 | EU214272 | EU213779 | EU213499 | EU626855 | EU626954 | yes |                            |
| Angiosperm | <i>Hyphaene petersiana</i>  | OM908(JRAU)                              | EU214008 | EU213671 | EU214273 | EU213780 | EU213500 | EU626856 | EU626955 | yes |                            |
| Angiosperm | <i>Hypochoeris radicata</i> | BM000954776 (BM)                         | FJ395786 | FJ395655 | FJ395390 | FJ395488 | FJ395583 | FJ395296 | NT       | no  |                            |
| Angiosperm | <i>Ilex aquifolium</i>      | BM000954709 (BM)                         | FJ395847 | FJ395717 | FJ395435 | FJ395543 | FJ395601 | FJ395349 | NT       | no  |                            |
| Angiosperm | <i>Ilex opaca</i>           | Kress 06-8345 (US)                       | GQ248957 | GQ248795 | GQ248140 | GQ248321 | GQ248624 | GQ247981 | GQ248476 | yes | Angiosperm - Guelph trials |
| Angiosperm | <i>Ilex paraguensis</i>     | USDA NA 53625 (US)                       | GQ248958 | GQ248796 | GQ248141 | GQ248322 | GQ248625 | GQ247982 | GQ248477 | yes | Angiosperm - Guelph trials |
| Angiosperm | <i>Ilex verticillata</i>    | N/A                                      | NT       | NT       | NT       | NT       | NT       | FJ513190 | -        | no  |                            |
| Angiosperm | <i>Impatiens balsamina</i>  | USDA OPGC 706                            | EF590625 | EF590457 | -        | EF590706 | EF590538 | -        | -        | no  |                            |
| Angiosperm | <i>Impatiens capensis</i>   | NMNH Wells 4333a                         | EF590626 | EF590458 | -        | DQ006157 | DQ006071 | -        | -        | no  |                            |
| Angiosperm | <i>Inga acuminata</i>       | Kursar & Coley 1266 (E)                  | AM919882 | AM920091 | AM920218 | AM922015 | FJ173735 | -        | FJ173633 | no  |                            |
| Angiosperm | <i>Inga auristellae</i>     | Brenes (Tag number 19242) (E)            | AM919888 | AM920092 | AM920210 | AM922016 | FJ173736 | -        | -        | no  |                            |
| Angiosperm | <i>Inga bourgonii</i>       | T.D. Pennington 16411 (E)                | AM919890 | AM920093 | AM920191 | AM922017 | AM920254 | -        | FJ173634 | no  |                            |
| Angiosperm | <i>Inga chocoensis</i>      | Zamora s.n. (Kew 1997-331) (E)           | AM919892 | AM920094 | AM920184 | AM922018 | AM920255 | -        | FJ173635 | no  |                            |
| Angiosperm | <i>Inga edulis</i>          | Daza 1444 (E)                            | AM919897 | AM920095 | AM920181 | AM922019 | AM920256 | FJ173504 | FJ173636 | yes |                            |
| Angiosperm | <i>Inga edulis</i>          | T.D.Pennington 16314 (E)                 | AM919898 | AM920096 | AM920183 | AM922021 | FJ173737 | -        | FJ173637 | no  |                            |
| Angiosperm | <i>Inga feullei</i>         | R.T.Pennington 734 (E)                   | AM919900 | AM920097 | AM920182 | AM922022 | AM920257 | FJ173505 | FJ173638 | yes |                            |
| Angiosperm | <i>Inga feullei</i>         | T.D.Pennington 16958 (E)                 | AM919901 | AM920098 | AM920214 | AM922023 | AM920258 | -        | FJ173639 | no  |                            |
| Angiosperm | <i>Inga feullei</i>         | R.T.Pennington 1123 (E)                  | AM919902 | AM920099 | AM920204 | AM922024 | AM920259 | -        | -        | no  |                            |
| Angiosperm | <i>Inga goldmanii</i>       | Kursar & Coley 1271 (E)                  | AM919903 | AM920100 | AM920206 | AM922025 | FJ173738 | -        | FJ205612 | no  |                            |
| Angiosperm | <i>Inga graciolor</i>       | T.D.Pennington 13814 (Kew 1993-1827) (E) | AM919904 | AM920101 | AM920213 | AM922026 | AM920260 | FJ173506 | FJ173640 | yes |                            |
| Angiosperm | <i>Inga jinicuil</i>        | T.D.Pennington 13568 (E)                 | AM919907 | AM920102 | AM920221 | AM922027 | FJ173739 | FJ173507 | FJ173641 | yes |                            |
| Angiosperm | <i>Inga leiocalycina</i>    | T.D.Pennington 13628 (Kew 1993-1825) (E) | AM919910 | AM920103 | AM920198 | AM922028 | AM920261 | -        | FJ205613 | no  |                            |
| Angiosperm | <i>Inga litoralis</i>       | T.D.Pennington 13578 (E)                 | AM919912 | -        | AM920190 | AM922029 | FJ173740 | -        | FJ205614 | no  |                            |
| Angiosperm | <i>Inga marginata</i>       | T.D.Pennington 16371 (E)                 | AM919915 | AM920104 | AM920180 | AM922030 | FJ173741 | -        | FJ173642 | no  |                            |
| Angiosperm | <i>Inga marginata</i>       | T.D.Pennington 16380 (E)                 | AM919916 | AM920105 | AM920186 | AM922031 | FJ173742 | -        | FJ173643 | no  |                            |
| Angiosperm | <i>Inga marginata</i>       | T.D.Pennington 16349                     | AM919917 | AM920106 | AM920188 | AM922032 | FJ173743 | -        | FJ173644 | no  |                            |

|            |                  |                                                                |          |          |          |          |          |          |          |     |  |
|------------|------------------|----------------------------------------------------------------|----------|----------|----------|----------|----------|----------|----------|-----|--|
|            |                  | (E)                                                            |          |          |          |          |          |          |          |     |  |
| Angiosperm | Inga marginata   | Kursar & Coley 1278 (Collected by S. Ring/ R. Rudolph) (E)     | AM919921 | AM920107 | AM920215 | AM922033 | FJ173744 | -        | -        | no  |  |
| Angiosperm | Inga multijuga   | T. D.Pennington 13633 (E)                                      | AM919924 | AM920108 | AM920195 | AM922034 | FJ173745 | -        | FJ173645 | no  |  |
| Angiosperm | Inga multijuga   | Kursar & Coley 1274 (E)                                        | AM919925 | AM920109 | -        | AM922035 | FJ173746 | -        | FJ173646 | no  |  |
| Angiosperm | Inga nobilis     | T.D.Pennington 16480 (Kew 1992-3473) (E)                       | AM919926 | AM920110 | AM920179 | AM922036 | AM920262 | -        | FJ173647 | no  |  |
| Angiosperm | Inga nobilis     | T.D. Pennington 15037 (Kew 1995-1776) (E)                      | AM919927 | AM920111 | AM920211 | AM922037 | AM920263 | FJ173508 | FJ173648 | yes |  |
| Angiosperm | Inga nobilis     | Kursar & Coley 1003 (E)                                        | AM919930 | AM920113 | AM920209 | AM922039 | FJ173747 | -        | FJ173649 | no  |  |
| Angiosperm | Inga punctata    | T. Brenes (Tag number 132971) (E)                              | AM919937 | AM920114 | AM920192 | AM922040 | FJ173748 | -        | -        | no  |  |
| Angiosperm | Inga punctata    | Kursar & Coley 1287 (Collected by B. Wolfe Feb 2005) (FC6) (E) | AM919938 | AM920115 | AM920200 | AM922041 | AM920264 | FJ173509 | FJ173650 | yes |  |
| Angiosperm | Inga punctata    | T.D.Pennington 15040 (Kew 1995-1778) (E)                       | AM919939 | AM920116 | AM920203 | AM922042 | AM920265 | FJ173511 | FJ173652 | yes |  |
| Angiosperm | Inga punctata    | T.D.Pennington 16903 (E)                                       | AM919940 | AM920117 | AM920212 | AM922043 | AM920266 | FJ173510 | -        | no  |  |
| Angiosperm | Inga punctata    | T.D.Pennington 16902 (E)                                       | AM919879 | AM920127 | AM920205 | AM922054 | AM920270 | -        | FJ173651 | no  |  |
| Angiosperm | Inga ruiziana    | T.D.Pennington 16948 (E)                                       | AM919946 | AM920118 | AM920202 | AM922044 | FJ173749 | -        | FJ173653 | no  |  |
| Angiosperm | Inga ruiziana    | Kursar & Coley 1256 (Collected by S. Ring/K. Rudolph) (E)      | AM919948 | AM920119 | AM920201 | AM922045 | FJ173750 | -        | -        | no  |  |
| Angiosperm | Inga ruiziana    | Brenes (Tag number 132841) (E)                                 | AM919950 | AM920120 | AM920217 | AM922046 | FJ173751 | -        | -        | no  |  |
| Angiosperm | Inga sapindoides | Zuniga s.n. (Kew 1991-1379) (E)                                | AM919952 | AM920121 | AM920219 | AM922047 | AM920267 | FJ173512 | FJ173654 | yes |  |
| Angiosperm | Inga sapindoides | Kursar & Coley 1258 (E)                                        | AM919954 | AM920123 | AM920185 | AM922049 | AM920268 | FJ173513 | -        | no  |  |
| Angiosperm | Inga sapindoides | Zuniga 1522 (Kew 1996-2762) (E)                                | AM919956 | AM920124 | AM920187 | AM922050 | AM920269 | FJ173514 | FJ173656 | yes |  |
| Angiosperm | Inga sertulifera | T.D.Pennington 16407 (E)                                       | AM919970 | -        | AM920197 | AM922052 | FJ173754 | -        | FJ205615 | no  |  |
| Angiosperm | Inga setosa      | T.D.Pennington 16400 (E)                                       | AM919971 | AM920126 | AM920189 | AM922053 | FJ173755 | FJ173515 | FJ173658 | yes |  |
| Angiosperm | Inga sp.         | Brenes (Tag number 21286) (E)                                  | AM919953 | AM920122 | AM920194 | AM922048 | FJ173752 | -        | FJ173655 | no  |  |
| Angiosperm | Inga spectabilis | T.D.Pennington 16405 (E)                                       | AM919974 | AM920128 | AM920196 | AM922055 | FJ173756 | -        | FJ173659 | no  |  |

|            |                             |                                          |          |          |          |          |          |          |          |     |                            |
|------------|-----------------------------|------------------------------------------|----------|----------|----------|----------|----------|----------|----------|-----|----------------------------|
| Angiosperm | <i>Inga tenuis</i>          | Garcia 743 (E)                           | AM919967 | AM920125 | AM920199 | AM922051 | FJ173753 | -        | FJ173657 | no  |                            |
| Angiosperm | <i>Inga tenuistipula</i>    | T.D.Pennington 13810 (Kew 1993-1826) (E) | AM919976 | AM920129 | AM920216 | AM922056 | AM920271 | FJ173516 | -        | no  |                            |
| Angiosperm | <i>Inga umbellifera</i>     | Kursar & Coley 1318 (E)                  | AM919980 | AM920130 | AM920208 | AM922057 | AM920272 | FJ173517 | -        | no  |                            |
| Angiosperm | <i>Inga umbellifera</i>     | Brenes (Tag number 63659) (E)            | AM919981 | AM920131 | -        | AM922058 | -        | -        | -        | no  |                            |
| Angiosperm | <i>Inga umbratica</i>       | Brenes (Tag number 174124) (E)           | AM919982 | AM920132 | AM920207 | AM922059 | FJ173757 | -        | -        | no  |                            |
| Angiosperm | <i>Inga vismiifolia</i>     | Garwood DIP 68 115870 (E)                | AM919986 | AM920133 | AM920220 | AM922060 | FJ173758 | -        | -        | no  |                            |
| Angiosperm | <i>Lactuca canadensis</i>   | JAG 0158 (OAC)                           | EU750230 | EU749090 | EU749320 | EU750468 | EU676927 | EU749536 | EU749780 | yes |                            |
| Angiosperm | <i>Lactuca canadensis</i>   | JAG 0735 (OAC)                           | EU750229 | EU749089 | EU749319 | EU750467 | EU676926 | EU749535 | EU749779 | yes |                            |
| Angiosperm | <i>Lactuca serriola</i>     | AP278 (OAC)                              | EU750231 | EU749091 | EU749321 | EU750469 | EU676928 | EU749537 | EU749781 | yes |                            |
| Angiosperm | <i>Lactuca serriola</i>     | JAG 0709 (OAC)                           | EU750232 | EU749092 | EU749322 | EU750470 | EU676929 | EU749538 | EU749782 | yes |                            |
| Angiosperm | <i>Lagenaria siceraria</i>  | USDA PI 271353 (US)                      | GQ248959 | GQ248797 | GQ248142 | GQ248323 | GQ248626 | GQ247983 | -        | no  | Angiosperm - Guelph trials |
| Angiosperm | <i>Lagenaria sphaerica</i>  | Kress 06-8346 (US)                       | GQ248960 | GQ248798 | GQ248143 | GQ248324 | GQ248627 | GQ247984 | -        | no  | Angiosperm - Guelph trials |
| Angiosperm | <i>Lamium album</i>         | BM000954803 (BM)                         | FJ395805 | FJ395674 | FJ395404 | FJ395503 | FJ395588 | FJ395313 | NT       | no  |                            |
| Angiosperm | <i>Lapsana communis</i>     | BM000954768 (BM)                         | FJ395797 | FJ395665 | FJ395399 | FJ395498 | -        | FJ395305 | NT       | no  |                            |
| Angiosperm | <i>Lathyrus pratensis</i>   | BM000954775 (BM)                         | FJ395787 | FJ395656 | -        | FJ395489 | -        | -        | NT       | no  |                            |
| Angiosperm | <i>Lemna minor</i>          | No voucher                               | FJ395863 | FJ395732 | -        | FJ395556 | -        | -        | NT       | no  |                            |
| Angiosperm | <i>Leucanthemum vulgare</i> | BM000954777 (BM)                         | FJ395785 | FJ395654 | FJ395389 | FJ395487 | -        | FJ395295 | NT       | no  |                            |
| Angiosperm | <i>Ligustrum vulgare</i>    | BM000954683 (BM)                         | FJ395854 | FJ395724 | FJ395441 | FJ395550 | FJ395605 | FJ395354 | NT       | no  |                            |
| Angiosperm | <i>Limonium rigualii</i>    | Lledo + Crespo LL10 (ABH)                | GQ248961 | GQ248799 | GQ248144 | GQ248325 | GQ248628 | GQ247985 | GQ248478 | yes | Angiosperm - Guelph trials |
| Angiosperm | <i>Limonium thiniense</i>   | Chase 1483 (K)                           | GQ248962 | GQ248800 | GQ248145 | GQ248326 | GQ248629 | GQ247986 | GQ248479 | yes | Angiosperm - Guelph trials |
| Angiosperm | <i>Linaria tristis</i>      | Chase 9916 (K)                           | GQ248963 | GQ248801 | AM889719 | GQ248327 | GQ248630 | GQ247987 | GQ248480 | yes | Angiosperm - Guelph trials |
| Angiosperm | <i>Linaria vulgaris</i>     | Chase 10789 (K)                          | GQ248964 | GQ248802 | GQ248146 | GQ248328 | GQ248631 | GQ247988 | GQ248481 | yes | Angiosperm - Guelph trials |
| Angiosperm | <i>Litsea collina</i>       | WP1B0051 (US)                            | GQ248965 | GQ248803 | GQ248147 | GQ248329 | GQ248632 | GQ247989 | GQ248482 | yes | Angiosperm - Guelph trials |
| Angiosperm | <i>Litsea timoriana</i>     | WP1A0018 (US)                            | GQ248966 | GQ248804 | GQ248148 | GQ248330 | GQ248633 | GQ247990 | GQ248483 | yes | Angiosperm - Guelph trials |
| Angiosperm | <i>Lobelia cardinalis</i>   | USBG 04-0230 (US)                        | GQ248967 | GQ248805 | GQ248149 | GQ248331 | GQ248634 | GQ247991 | GQ248484 | yes | Angiosperm - Guelph trials |
| Angiosperm | <i>Lobelia inflata</i>      | Kress 06-8352 (US)                       | GQ248968 | GQ248806 | NT*      | GQ248332 | GQ248635 | GQ247992 | GQ248485 | no  | Angiosperm - Guelph trials |
| Angiosperm | <i>Lolium perenne</i>       | BM000954712 (BM)                         | FJ395843 | FJ395713 | FJ395431 | FJ395539 | -        | FJ395346 | NT       | no  |                            |
| Angiosperm | <i>Lotus corniculatus</i>   | BM000954719 (BM)                         | FJ395839 | FJ395708 | -        | -        | -        | -        | NT       | no  |                            |
| Angiosperm | <i>Ludisia dawsoniana</i>   | USBG 88-0018                             | EF590631 | EF590463 | -        | -        | EF590543 | -        | -        | no  |                            |
| Angiosperm | <i>Ludisia discolor</i>     | USBG 01-0948                             | EF590632 | EF590464 | -        | -        | EF590544 | -        | -        | no  |                            |
| Angiosperm | <i>Luzula campestris</i>    | BM000954694 (BM)                         | FJ395808 | FJ395677 | FJ395407 | -        | -        | FJ395316 | NT       | no  |                            |
| Angiosperm | <i>Magnolia grandiflora</i> | Chase 6695 (K)                           | GQ248969 | GQ248807 | GQ248150 | GQ248333 | GQ248636 | GQ247993 | GQ248486 | yes | Angiosperm - Guelph trials |

|            |                                  |                                 |          |          |          |          |          |          |          |     |                            |
|------------|----------------------------------|---------------------------------|----------|----------|----------|----------|----------|----------|----------|-----|----------------------------|
| Angiosperm | <i>Magnolia grandiflora</i>      | Kress 06-8358 (US)              | GQ248970 | GQ248808 | GQ248151 | GQ248334 | GQ248637 | GQ247994 | GQ248487 | yes | Angiosperm - Guelph trials |
| Angiosperm | <i>Magnolia guatemalensis</i>    | Chase 6519 (K)                  | GQ248971 | GQ248809 | GQ248152 | GQ248335 | GQ248638 | GQ247995 | GQ248488 | yes | Angiosperm - Guelph trials |
| Angiosperm | <i>Magnolia virginiana</i>       | USDA NA 61237 - GU102 (US)      | GQ248972 | GQ248810 | GQ248153 | GQ248336 | GQ248639 | GQ247996 | -        | no  | Angiosperm - Guelph trials |
| Angiosperm | <i>Malus domestica</i>           | FJR; 27715 (BM)                 | -        | FJ395620 | FJ395367 | FJ395455 | -        | -        | NT       | no  |                            |
| Angiosperm | <i>Malva alcea</i>               | USDA PI 477991 (US)             | GQ248973 | GQ248811 | GQ248154 | GQ248337 | GQ248640 | GQ247997 | GQ248489 | yes | Angiosperm - Guelph trials |
| Angiosperm | <i>Malva sylvestris</i>          | Kress 06-8168 (US)              | GQ248974 | GQ248812 | GQ248155 | GQ248338 | GQ248641 | GQ247998 | GQ248490 | yes | Angiosperm - Guelph trials |
| Angiosperm | <i>Melica uniflora</i>           | BM000954786 (BM)                | FJ395775 | FJ395645 | -        | FJ395479 | -        | FJ395285 | NT       | no  |                            |
| Angiosperm | <i>Mercurialis perennis</i>      | BM000954799 (BM)                | FJ395762 | FJ395633 | -        | FJ395469 | FJ395570 | FJ395274 | NT       | no  |                            |
| Angiosperm | <i>Mimetes arboreus</i>          | Latimer 27107: SANBI, LHMS 1700 | GQ248975 | GQ248813 | GQ248156 | GQ248339 | GQ248642 | GQ247999 | GQ248491 | yes | Angiosperm - Guelph trials |
| Angiosperm | <i>Mimetes hirtus</i>            | SANBI, LHMS 19                  | GQ248976 | GQ248814 | GQ248157 | GQ248340 | GQ248643 | GQ248000 | GQ248492 | yes | Angiosperm - Guelph trials |
| Angiosperm | <i>Miscanthus sacchariflorum</i> | Renvoize 5810 (K)               | GQ248977 | GQ248815 | GQ248158 | GQ248341 | GQ248644 | GQ248001 | GQ248493 | yes | Angiosperm - Guelph trials |
| Angiosperm | <i>Miscanthus sacchariflorum</i> | Renvoize 5786 (K)               | AM889909 | AM889818 | AM889725 | NT       | NT       | NT       | NT       | no  |                            |
| Angiosperm | <i>Miscanthus sinensis</i>       | Renvoize 5798 (K)               | NT*      | GQ248816 | GQ248159 | GQ248342 | GQ248645 | GQ248002 | GQ248494 | no  | Angiosperm - Guelph trials |
| Angiosperm | <i>Miscanthus sinensis</i>       | Renvoize 5801 (K)               | AM889910 | AM889819 | AM889726 | NT       | NT       | NT       | NT       | no  |                            |
| Angiosperm | <i>Moraea pallida</i>            | Goldblatt & Porter 12041 (NBG)  | GQ248978 | GQ248817 | GQ248160 | GQ248343 | GQ248646 | GQ248003 | GQ248495 | yes | Angiosperm - Guelph trials |
| Angiosperm | <i>Moraea simplex</i>            | Goldblatt & Porter 12231 (NBG)  | GQ248979 | GQ248818 | GQ248161 | GQ248344 | GQ248647 | GQ248004 | GQ248496 | yes | Angiosperm - Guelph trials |
| Angiosperm | <i>Morella caroliniensis</i>     | USDA 66564-BC40 (US)            | GQ248980 | GQ248819 | GQ248162 | GQ248345 | GQ248648 | GQ248005 | -        | no  | Angiosperm - Guelph trials |
| Angiosperm | <i>Morella cerifera</i>          | USDA PI 434149 (US)             | EF590637 | EF590469 | EF590411 | EF590715 | EF590549 | NT*      | -        | no  | Angiosperm - Guelph trials |
| Angiosperm | <i>Muraltia aspalatha</i>        | Forest 227 (K, NBG)             | GQ248981 | GQ248820 | AM889729 | GQ248346 | GQ248649 | GQ248006 | -        | no  | Angiosperm - Guelph trials |
| Angiosperm | <i>Muraltia thunbergii</i>       | Forest 250 (K, NBG)             | GQ248982 | GQ248821 | AM889730 | GQ248347 | GQ248650 | GQ248007 | -        | no  | Angiosperm - Guelph trials |
| Angiosperm | <i>Myosotis sylvatica</i>        | BM000954790 (BM)                | FJ395761 | FJ395632 | FJ395375 | -        | -        | -        | NT       | no  |                            |
| Angiosperm | <i>Myrcia coumeta</i>            | Lucas 107 (K)                   | GQ248983 | GQ248822 | GQ248163 | GQ248348 | GQ248651 | GQ248008 | GQ248497 | yes | Angiosperm - Guelph trials |
| Angiosperm | <i>Myrcia fallax</i>             | Prevost et al 4716 (K)          | GQ248984 | GQ248823 | GQ248164 | GQ248349 | GQ248652 | GQ248009 | GQ248498 | yes | Angiosperm - Guelph trials |
| Angiosperm | <i>Myristica fatua</i>           | WP1D0188 (US)                   | GQ248985 | GQ248824 | GQ248165 | GQ248350 | GQ248653 | GQ248010 | GQ248499 | yes | Angiosperm - Guelph trials |
| Angiosperm | <i>Myristica globosa</i>         | WP2B0412 (US)                   | GQ248986 | GQ248825 | GQ248166 | GQ248351 | GQ248654 | GQ248011 | GQ248500 | yes | Angiosperm - Guelph trials |
| Angiosperm | <i>Myrothamnus flabellifolia</i> | OM1137(JRAU)                    | EU214010 | EU213673 | EU214275 | EU213840 | EU213502 | EU626857 | EU626956 | yes |                            |
| Angiosperm | <i>Myrothamnus flabellifolia</i> | OM1209(KNP)                     | EU214011 | EU213674 | EU214276 | EU213841 | EU213503 | EU626858 | EU626957 | yes |                            |

|            |                                   |                      |                    |          |          |          |          |          |          |     |                            |
|------------|-----------------------------------|----------------------|--------------------|----------|----------|----------|----------|----------|----------|-----|----------------------------|
| Angiosperm | Myrothamnus flabellifolia         | OM285(JRAU)          | EU214009           | EU213672 | EU214274 | EU213839 | EU213501 | EU626859 | EU626958 | yes |                            |
| Angiosperm | Nicotiana noctiflora              | Lim 005 (BM)         | GQ248987           | GQ248826 | GQ248167 | GQ248352 | GQ248655 | GQ248012 | GQ248501 | yes | Angiosperm - Guelph trials |
| Angiosperm | Nicotiana petunioides             | Lim 001 (BM)         | GQ248988           | GQ248827 | GQ248168 | GQ248353 | GQ248656 | GQ248013 | GQ248502 | yes | Angiosperm - Guelph trials |
| Angiosperm | Odontites vernus ssp. serotinus   | BM000954693 (BM)     | FJ395745           | FJ395619 | FJ395366 | -        | FJ395565 | FJ395262 | NT       | no  |                            |
| Angiosperm | Ophrys araneola                   | Chase O- 701 (K)     | GQ248989           | GQ248828 | GQ248169 | GQ248354 | GQ248657 | GQ248014 | -        | no  | Angiosperm - Guelph trials |
| Angiosperm | Ophrys fuciflora var. episcopalis | Bateman 17 (K)       | GQ248990           | GQ248829 | GQ248170 | GQ248355 | GQ248658 | GQ248015 | -        | no  | Angiosperm - Guelph trials |
| Angiosperm | Opuntia fragilis                  | USBG - sn (US)       | GQ248991           | GQ248830 | GQ248171 | GQ248356 | GQ248659 | GQ248016 | -        | no  | Angiosperm - Guelph trials |
| Angiosperm | Opuntia humifusa                  | Kress 06-8355 (US)   | GQ248992           | GQ248831 | GQ248172 | GQ248357 | GQ248660 | GQ248017 | -        | no  | Angiosperm - Guelph trials |
| Angiosperm | Origanum vulgare                  | FJR; 27712 (BM)      | FJ395743           | FJ395617 | FJ395365 | -        | FJ395564 | FJ395260 | NT       | no  |                            |
| Angiosperm | Oxalis europeae                   | NMNH Wisner 4        | EF590641           | EF590473 | -        | DQ006207 | DQ006110 | -        | -        | no  |                            |
| Angiosperm | Oxalis violaceae                  | NMNH 88-364          | EF590642           | EF590474 | -        | EF590719 | EF590553 | -        | -        | no  |                            |
| Angiosperm | Paeonia kavachensis               | Chase 16254 (K)      | GQ248993           | GQ248832 | GQ248173 | GQ248358 | GQ248661 | GQ248018 | GQ248503 | yes | Angiosperm - Guelph trials |
| Angiosperm | Paeonia tenuifolia                | Chase 2742 (K)       | GQ248994           | GQ248833 | GQ248174 | GQ248359 | GQ248662 | GQ248019 | GQ248504 | yes | Angiosperm - Guelph trials |
| Angiosperm | Papaver bracteatum                | USDA PI374712 (US)   | EF590643           | NT*      | NT*      | EF590720 | NT*      | NT*      | -        | no  | Angiosperm - Guelph trials |
| Angiosperm | Papaver rhoeas                    | USDA PI533721 (US)   | GQ248995           | GQ248834 | GQ248175 | GQ248360 | GQ248663 | GQ248020 | GQ248505 | yes | Angiosperm - Guelph trials |
| Angiosperm | Passiflora incarnata              | USDA_OPGC686 (US)    | GQ248996           | GQ248835 | -        | GQ248361 | GQ248664 | GQ248021 | -        | no  | Angiosperm - Guelph trials |
| Angiosperm | Passiflora quadrangularis         | USDA HPAS30 (US)     | GQ248997           | GQ248836 | GQ248176 | GQ248362 | GQ248665 | GQ248022 | -        | no  | Angiosperm - Guelph trials |
| Angiosperm | Phleum bertolonii                 | BM000954736 (BM)     | FJ395824, FJ395825 | FJ395695 | FJ395422 | FJ395520 | -        | FJ395331 | NT       | no  |                            |
| Angiosperm | Phleum pratense                   | BM000954701 (BM)     | FJ395746           | FJ395621 | FJ395368 | FJ395456 | -        | FJ395263 | NT       | no  |                            |
| Angiosperm | Phylica arborea                   | JE Richardson 51 (K) | GQ248998           | GQ248837 | GQ248177 | GQ248363 | GQ248666 | GQ248023 | -        | no  | Angiosperm - Guelph trials |
| Angiosperm | Phylica paniculata                | CFR 136 (K)          | GQ248999           | GQ248838 | NT*      | GQ248364 | GQ248667 | GQ248024 | GQ248506 | no  | Angiosperm - Guelph trials |
| Angiosperm | Pimpinella saxifraga              | BM000954705 (BM)     | FJ395736           | FJ395610 | FJ395362 | FJ395450 | FJ395558 | FJ395252 | NT       | no  |                            |
| Angiosperm | Piper auritum                     | NMNH 06-8354         | EF590649           | EF590477 | -        | EF590726 | EF590560 | -        | -        | no  |                            |
| Angiosperm | Piper nigrum                      | USDA TARS 12404      | EF590650           | EF590478 | -        | EF590727 | EF590561 | -        | -        | no  |                            |
| Angiosperm | Planchonella ripicola             | WP1E0221 (US)        | GQ249013           | GQ248848 | GQ248187 | GQ248378 | GQ248683 | GQ248040 | -        | no  | Angiosperm - Guelph trials |
| Angiosperm | Plantago lanceolata               | Ronsted 33 (C)       | GQ249004           | GQ248839 | GQ248178 | GQ248368 | GQ248672 | GQ248029 | GQ248510 | yes | Angiosperm - Guelph trials |
| Angiosperm | Plantago lanceolata               | Chase 2765 (K)       | AM889927           | AM889836 | -        | NT       | NT       | NT       | NT       | no  |                            |
| Angiosperm | Plantago lanceolata               | AP058 (OAC)          | EU750233           | EU749093 | EU749323 | EU750471 | EU676930 | EU749539 | EU749783 | yes |                            |
| Angiosperm | Plantago lanceolata               | BM000954717 (BM)     | FJ395842           | FJ395712 | FJ395430 | FJ395538 | -        | FJ395345 | NT       | no  |                            |

|            |                         |                      |          |          |          |          |          |          |          |     |                            |
|------------|-------------------------|----------------------|----------|----------|----------|----------|----------|----------|----------|-----|----------------------------|
| Angiosperm | Plantago lanceolata     | N/A                  | NT       | NT       | NT       | NT       | NT       | FJ513191 | -        | no  |                            |
| Angiosperm | Plantago lanceolata     | JAG 0220 (OAC)       | EU750234 | EU749094 | EU749324 | EU750472 | EU676931 | EU749540 | EU749784 | yes |                            |
| Angiosperm | Plantago lanceolata     | JAG 0270 (OAC)       | EU750235 | EU749095 | EU749325 | EU750473 | EU676932 | EU749541 | EU749785 | yes |                            |
| Angiosperm | Plantago lanceolata     | USDA PI 596469 (US)  | GQ249005 | GQ248840 | GQ248179 | GQ248369 | GQ248673 | GQ248030 | GQ248511 | yes | Angiosperm - Guelph trials |
| Angiosperm | Plantago major          | Ronsted 41 (C)       | GQ249006 | GQ248841 | GQ248180 | GQ248370 | GQ248674 | GQ248031 | GQ248512 | yes | Angiosperm - Guelph trials |
| Angiosperm | Plantago major          | Chase 2948 (K)       | AM889928 | AM889837 | -        | NT       | NT       | NT       | NT       | no  |                            |
| Angiosperm | Plantago major          | AP293 (OAC)          | EU750238 | EU749098 | EU749328 | EU750476 | EU676935 | EU749544 | EU749788 | yes |                            |
| Angiosperm | Plantago major          | JAG 0299 (OAC)       | EU750237 | EU749097 | EU749327 | EU750475 | EU676934 | EU749543 | EU749787 | yes |                            |
| Angiosperm | Plantago major          | JAG 0434 (OAC)       | EU750236 | EU749096 | EU749326 | EU750474 | EU676933 | EU749542 | EU749786 | yes |                            |
| Angiosperm | Plantago ovata          | USDA PI 596469b (US) | GQ249007 | GQ248842 | GQ248181 | GQ248371 | GQ248675 | GQ248032 | -        | no  | Angiosperm - Guelph trials |
| Angiosperm | Plantago rugelii        | AP210 (OAC)          | EU750240 | EU749100 | EU749330 | EU750478 | EU676937 | EU749546 | EU749790 | yes |                            |
| Angiosperm | Plantago rugelii        | JAG 0092 (OAC)       | EU750239 | EU749099 | EU749329 | EU750477 | EU676936 | EU749545 | EU749789 | yes |                            |
| Angiosperm | Plantago rugelii        | USDA PI 596469       | EF590652 | EF590480 | -        | EF590729 | EF590562 | NT       | NT       | no  |                            |
| Angiosperm | Poa annua               | BM000954676 (BM)     | FJ395741 | FJ395615 | -        | -        | -        | FJ395258 | NT       | no  |                            |
| Angiosperm | Poa annua               | JAG 0361 (OAC)       | EU750241 | EU749101 | EU749331 | EU750479 | EU676938 | EU749547 | EU749791 | yes |                            |
| Angiosperm | Poa annua               | JAG 0410 (OAC)       | EU750242 | EU749102 | EU749332 | EU750480 | EU676939 | EU749548 | EU749792 | yes |                            |
| Angiosperm | Poa compressa           | JAG 0223 (OAC)       | EU750243 | EU749103 | EU749333 | EU750481 | EU676940 | EU749549 | EU749793 | yes |                            |
| Angiosperm | Poa compressa           | JAG 0278 (OAC)       | EU750244 | EU749104 | EU749334 | EU750482 | EU676941 | EU749550 | EU749794 | yes |                            |
| Angiosperm | Poa compressa           | JAG 0315 (OAC)       | EU750245 | EU749105 | EU749335 | EU750483 | EU676942 | EU749551 | EU749795 | yes |                            |
| Angiosperm | Poa pratensis           | BM000954742 (BM)     | FJ395818 | FJ395688 | FJ395415 | FJ395514 | -        | FJ395325 | NT       | no  |                            |
| Angiosperm | Poa trivialis           | BM000954686 (BM)     | FJ395747 | -        | FJ395369 | FJ395457 | -        | FJ395264 | NT       | no  |                            |
| Angiosperm | Polyalthia glauca       | WP2B0534 (US)        | GQ249008 | GQ248843 | GQ248182 | GQ248372 | GQ248676 | GQ248033 | GQ248513 | yes | Angiosperm - Guelph trials |
| Angiosperm | Polyalthia oblongifolia | WP2A0446 (US)        | GQ249009 | GQ248844 | GQ248183 | GQ248373 | GQ248677 | GQ248034 | GQ248514 | yes | Angiosperm - Guelph trials |
| Angiosperm | Polygonum aviculare     | BM000954806 (BM)     | FJ395748 | -        | -        | FJ395458 | -        | FJ395265 | NT       | no  |                            |
| Angiosperm | Polygonum aviculare     | AP232 (OAC)          | EU750246 | EU749106 | EU749336 | EU750484 | EU676943 | EU749552 | EU749796 | yes |                            |
| Angiosperm | Polygonum aviculare     | JAG 0127 (OAC)       | EU750249 | EU749109 | EU749339 | EU750487 | EU676946 | EU749555 | EU749799 | yes |                            |
| Angiosperm | Polygonum aviculare     | JAG 0214 (OAC)       | EU750248 | EU749108 | EU749338 | EU750486 | EU676945 | EU749554 | EU749798 | yes |                            |
| Angiosperm | Polygonum aviculare     | JAG 0377 (OAC)       | EU750247 | EU749107 | EU749337 | EU750485 | EU676944 | EU749553 | EU749797 | yes |                            |
| Angiosperm | Polygonum convolvulus   | AP384 (OAC)          | EU750251 | EU749111 | EU749341 | EU750489 | EU676948 | EU749557 | EU749801 | yes |                            |
| Angiosperm | Polygonum convolvulus   | JAG 0086 (OAC)       | EU750250 | EU749110 | EU749340 | EU750488 | EU676947 | EU749556 | EU749800 | yes |                            |
| Angiosperm | Polygonum hydropiper    | AP360 (OAC)          | EU750252 | EU749112 | EU749342 | EU750490 | EU676949 | EU749558 | EU749802 | yes |                            |
| Angiosperm | Polygonum hydropiper    | JAG 0048 (OAC)       | EU750253 | EU749113 | EU749343 | EU750491 | EU676950 | EU749559 | EU749803 | yes |                            |
| Angiosperm | Polygonum persicaria    | AP295 (OAC)          | EU750256 | EU749116 | EU749346 | EU750494 | EU676953 | EU749562 | EU749806 | yes |                            |
| Angiosperm | Polygonum persicaria    | JAG 0074 (OAC)       | EU750255 | EU749115 | EU749345 | EU750493 | EU676952 | EU749561 | EU749805 | yes |                            |
| Angiosperm | Polygonum persicaria    | JAG 0128 (OAC)       | EU750254 | EU749114 | EU749344 | EU750492 | EU676951 | EU749560 | EU749804 | yes |                            |
| Angiosperm | Populus alba            | C. Lexer 11-M4       | GQ249010 | GQ248845 | GQ248184 | GQ248375 | GQ248680 | GQ248037 | GQ248516 | yes | Angiosperm - Guelph trials |
| Angiosperm | Populus balsamifera     | AP376 (OAC)          | EU750258 | EU749118 | EU749348 | EU750496 | EU676955 | EU749564 | EU749808 | yes |                            |
| Angiosperm | Populus balsamifera     | JAG 0244 (OAC)       | EU750257 | EU749117 | EU749347 | EU750495 | EU676954 | EU749563 | EU749807 | yes |                            |

|            |                              |                        |          |          |          |                    |          |          |          |     |                            |
|------------|------------------------------|------------------------|----------|----------|----------|--------------------|----------|----------|----------|-----|----------------------------|
| Angiosperm | <i>Populus deltoides</i>     | JAG 0061 (OAC)         | EU750261 | EU749121 | EU749351 | EU750499           | EU676958 | EU749567 | EU749811 | yes |                            |
| Angiosperm | <i>Populus deltoides</i>     | JAG 0391 (OAC)         | EU750259 | EU749119 | EU749349 | EU750497           | EU676956 | EU749565 | EU749809 | yes |                            |
| Angiosperm | <i>Populus deltoides</i>     | JAG 0435 (OAC)         | EU750260 | EU749120 | EU749350 | EU750498           | EU676957 | EU749566 | EU749810 | yes |                            |
| Angiosperm | <i>Populus grandidentata</i> | AP425 (OAC)            | EU750264 | EU749124 | EU749354 | EU750502           | EU676961 | EU749570 | EU749814 | yes |                            |
| Angiosperm | <i>Populus grandidentata</i> | JAG 0219 (OAC)         | EU750263 | EU749123 | EU749353 | EU750501           | EU676960 | EU749569 | EU749813 | yes |                            |
| Angiosperm | <i>Populus grandidentata</i> | JAG 0339 (OAC)         | EU750262 | EU749122 | EU749352 | EU750500           | EU676959 | EU749568 | EU749812 | yes |                            |
| Angiosperm | <i>Populus tremula</i>       | C. Lexer TO5-M4        | GQ249011 | GQ248846 | GQ248185 | GQ248376           | GQ248681 | GQ248038 | GQ248517 | yes | Angiosperm - Guelph trials |
| Angiosperm | <i>Populus tremuloides</i>   | AP380 (OAC)            | EU750267 | EU749127 | EU749357 | EU750505           | EU676964 | EU749573 | EU749817 | yes |                            |
| Angiosperm | <i>Populus tremuloides</i>   | JAG 0205 (OAC)         | EU750266 | EU749126 | EU749356 | EU750504           | EU676963 | EU749572 | EU749816 | yes |                            |
| Angiosperm | <i>Populus tremuloides</i>   | JAG 0277 (OAC)         | EU750265 | EU749125 | EU749355 | EU750503           | EU676962 | EU749571 | EU749815 | yes |                            |
| Angiosperm | <i>Potentilla reptans</i>    | BM000954730 (BM)       | FJ395831 | FJ395700 | FJ395425 | FJ395525           | FJ395596 | FJ395336 | NT       | no  |                            |
| Angiosperm | <i>Potentilla sterilis</i>   | BM000954670 (BM)       | FJ395862 | FJ395731 | FJ395447 | FJ395555           | -        | FJ395358 | NT       | no  |                            |
| Angiosperm | <i>Pouteria obovoidea</i>    | WP2A0433 (US)          | GQ249012 | GQ248847 | GQ248186 | GQ248377           | GQ248682 | GQ248039 | -        | no  | Angiosperm - Guelph trials |
| Angiosperm | <i>Primula vulgaris</i>      | BM000954685 (BM)       | FJ395752 | -        | -        | -                  | FJ395567 | -        | NT       | no  |                            |
| Angiosperm | <i>Protea angustata</i>      | Fleetwood 05 (K)       | GQ249014 | GQ248849 | GQ248188 | GQ248379           | GQ248684 | GQ248041 | GQ248518 | yes | Angiosperm - Guelph trials |
| Angiosperm | <i>Protea angustata</i>      | Reeves & Rebelo 6 (K)  | AM889931 | AM889840 | AM889741 | NT                 | NT       | NT       | NT       | no  |                            |
| Angiosperm | <i>Protea sulphurea</i>      | Reeves & Rebelo 37 (K) | AM889932 | AM889841 | AM889742 | NT                 | NT       | NT       | NT       | no  |                            |
| Angiosperm | <i>Protea witzenbergiana</i> | Rebelo & Reeves 32 (K) | GQ249015 | GQ248850 | GQ248189 | GQ248380           | GQ248685 | GQ248042 | GQ248519 | yes | Angiosperm - Guelph trials |
| Angiosperm | <i>Prunella vulgaris</i>     | BM000954729 (BM)       | FJ395832 | FJ395701 | FJ395426 | FJ395526           | -        | FJ395337 | NT       | no  |                            |
| Angiosperm | <i>Prunus avium</i>          | BM000954678 (BM)       | FJ395855 | FJ395725 | FJ395442 | FJ395551           | -        | -        | NT       | no  |                            |
| Angiosperm | <i>Prunus spinosa</i>        | BM000954682 (BM)       | FJ395853 | FJ395723 | FJ395440 | FJ395549           | -        | -        | NT       | no  |                            |
| Angiosperm | <i>Prunus virginiana</i>     | Kress 06-8282 (US)     | GQ249016 | GQ248851 | GQ248190 | GQ248381           | GQ248686 | GQ248043 | GQ248520 | yes | Angiosperm - Guelph trials |
| Angiosperm | <i>Prunus yedoense</i>       | Kress 06-8281 (US)     | GQ249017 | GQ248852 | GQ248191 | GQ248382           | GQ248687 | GQ248044 | -        | no  | Angiosperm - Guelph trials |
| Angiosperm | <i>Quercus alba</i>          | JAG 0254 (OAC)         | EU750268 | EU749128 | -        | EU750506           | EU676965 | EU749574 | EU749818 | no  |                            |
| Angiosperm | <i>Quercus alba</i>          | JAG 0353 (OAC)         | EU750270 | EU749130 | EU749359 | EU750508           | EU676967 | EU749576 | EU749820 | yes |                            |
| Angiosperm | <i>Quercus alba</i>          | JAG 0373 (OAC)         | EU750269 | EU749129 | EU749358 | EU750507           | EU676966 | EU749575 | EU749819 | yes |                            |
| Angiosperm | <i>Quercus alba</i>          | JAG 0407 (OAC)         | EU750271 | EU749131 | EU749360 | EU750509           | EU676968 | EU749577 | EU749821 | yes |                            |
| Angiosperm | <i>Quercus cf. velutina</i>  | JAG 0350 (OAC)         | EU750272 | EU749132 | EU749361 | EU750510           | EU676969 | EU749578 | EU749822 | yes |                            |
| Angiosperm | <i>Quercus ilex</i>          | BM000954679 (BM)       | FJ395856 | FJ395726 | -        | FJ395552           | -        | -        | NT       | no  |                            |
| Angiosperm | <i>Quercus macrocarpa</i>    | JAG 0266 (OAC)         | EU750273 | EU749133 | EU749362 | EU750511           | EU676970 | EU749579 | EU749823 | yes |                            |
| Angiosperm | <i>Quercus macrocarpa</i>    | JAG 0326 (OAC)         | EU750274 | EU749134 | EU749363 | EU750512           | EU676971 | EU749580 | EU749824 | yes |                            |
| Angiosperm | <i>Quercus robur</i>         | BM000954710 (BM)       | FJ395846 | FJ395716 | FJ395434 | FJ395542           | -        | FJ395348 | NT       | no  |                            |
| Angiosperm | <i>Quercus rubra</i>         | AP303 (OAC)            | EU750277 | EU749137 | EU749366 | EU750515           | EU676974 | EU749583 | EU749827 | yes |                            |
| Angiosperm | <i>Quercus rubra</i>         | JAG 0255 (OAC)         | EU750276 | EU749136 | EU749365 | EU750514           | EU676973 | EU749582 | EU749826 | yes |                            |
| Angiosperm | <i>Quercus rubra</i>         | JAG 0317 (OAC)         | EU750275 | EU749135 | EU749364 | EU750513           | EU676972 | EU749581 | EU749825 | yes |                            |
| Angiosperm | <i>Ranunculus acris</i>      | BM000954718 (BM)       | FJ395840 | FJ395709 | -        | FJ395535           | -        | FJ395343 | NT       | no  |                            |
| Angiosperm | <i>Ranunculus auricomus</i>  | BM000954781 (BM)       | FJ395782 | FJ395651 | -        | FJ395484, FJ395485 | -        | FJ395292 | NT       | no  |                            |

|            |                            |                     |          |          |          |                       |          |          |          |     |                            |
|------------|----------------------------|---------------------|----------|----------|----------|-----------------------|----------|----------|----------|-----|----------------------------|
| Angiosperm | Ranunculus bulbosus        | BM000954794 (BM)    | FJ395770 | FJ395641 | -        | -                     | -        | FJ395281 | NT       | no  |                            |
| Angiosperm | Ranunculus repens          | BM000954703 (BM)    | FJ395757 | FJ395629 | -        | FJ395466              | -        | FJ395270 | NT       | no  |                            |
| Angiosperm | Raphanus raphanistrum      | USDA PI271451 (US)  | GQ249018 | GQ248853 | GQ248192 | GQ248383              | EF590570 | GQ248045 | -        | no  | Angiosperm - Guelph trials |
| Angiosperm | Raphanus sativus           | USDA PI508053 (US)  | GQ249019 | GQ248854 | GQ248193 | GQ248384              | GQ248688 | GQ248046 | -        | no  | Angiosperm - Guelph trials |
| Angiosperm | Rhamnus alnifolia          | JEM 029 (BPNP)      | EU750278 | EU749138 | EU749367 | EU750516              | EU676975 | EU749584 | EU749828 | yes |                            |
| Angiosperm | Rhamnus alnifolia          | CAL 0229 (OAC)      | EU750279 | EU749139 | EU749368 | EU750517              | EU676976 | EU749585 | EU749829 | yes |                            |
| Angiosperm | Rhamnus cathartica         | AP296 (OAC)         | EU750282 | EU749142 | EU749371 | EU750520              | EU676979 | EU749588 | EU749832 | yes |                            |
| Angiosperm | Rhamnus cathartica         | JAG 0332 (OAC)      | EU750280 | EU749140 | EU749369 | EU750518              | EU676977 | EU749586 | EU749830 | yes |                            |
| Angiosperm | Rhamnus cathartica         | JAG 0372 (OAC)      | EU750281 | EU749141 | EU749370 | EU750519              | EU676978 | EU749587 | EU749831 | yes |                            |
| Angiosperm | Rhamnus cathartica         | RBG-Blitz 042 (OAC) | EU750283 | EU749143 | EU749372 | EU750521              | EU676980 | EU749589 | EU749833 | yes |                            |
| Angiosperm | Rhamnus frangula           | JAG 0265 (OAC)      | EU750285 | EU749145 | EU749374 | EU750523              | EU676982 | EU749591 | EU749835 | yes |                            |
| Angiosperm | Rhamnus frangula           | JAG 0313 (OAC)      | EU750284 | EU749144 | EU749373 | EU750522              | EU676981 | EU749590 | EU749834 | yes |                            |
| Angiosperm | Rhus gueinzii              | OM265 (JRAU)        | EU214012 | EU213675 | EU214277 | EU213842              | EU213504 | EU626860 | EU626959 | yes |                            |
| Angiosperm | Rhus gueinzii              | RL1366 (KNP)        | EU214013 | EU213676 | EU214278 | EU213843              | EU213505 | EU626861 | EU626960 | yes |                            |
| Angiosperm | Rhus gueinzii              | RL1474 (KNP)        | EU214014 | EU213677 | EU214279 | EU213844              | EU213506 | EU626862 | EU626961 | yes |                            |
| Angiosperm | Rhus leptodictya           | RBN205 (JRAU)       | EU214015 | EU213678 | EU214280 | EU213845              | EU213507 | EU626863 | EU626962 | yes |                            |
| Angiosperm | Rhus leptodictya           | RL1645 (KNP)        | EU214016 | EU213679 | EU214281 | EU213846              | EU213508 | EU626864 | EU626963 | yes |                            |
| Angiosperm | Rhus leptodictya           | RL1655 (KNP)        | EU214017 | EU213680 | EU214282 | EU213847              | EU213509 | EU626865 | EU626964 | yes |                            |
| Angiosperm | Rhus transvaalensis        | OM282(JRAU)         | EU214018 | EU213681 | EU214283 | EU213848              | EU213510 | EU626866 | EU626965 | yes |                            |
| Angiosperm | Rhus transvaalensis        | OM943(JRAU)         | EU214019 | EU213682 | -        | EU213849              | EU213511 | EU626867 | EU626966 | no  |                            |
| Angiosperm | Rhus transvaalensis        | RL1427(KNP)         | EU214020 | EU213683 | EU214284 | EU213850              | EU213512 | EU626868 | EU626967 | yes |                            |
| Angiosperm | Rhynchosstele bictoniensis | Kew 1998-2152       | GQ249020 | GQ248855 | GQ248194 | GQ248385              | GQ248689 | GQ248047 | GQ248521 | yes | Angiosperm - Guelph trials |
| Angiosperm | Rhynchosstele cordata      | Chase O-1355 (K)    | GQ249021 | GQ248856 | GQ248195 | GQ248386              | GQ248690 | GQ248048 | GQ248522 | yes | Angiosperm - Guelph trials |
| Angiosperm | Ribes rubrum               | BM000954691 (BM)    | FJ395751 | FJ395624 | -        | FJ395461              | -        | -        | NT       | no  |                            |
| Angiosperm | Rosa arvensis              | BM000954804 (BM)    | FJ395849 | FJ395719 | -        | FJ395545              | -        | -        | NT       | no  |                            |
| Angiosperm | Rosa canina agg.           | BM000954681 (BM)    | FJ395852 | FJ395722 | FJ395439 | FJ395548              | -        | FJ395353 | NT       | no  |                            |
| Angiosperm | Rubus allegheniensis       | AP084 (OAC)         | EU750286 | EU749146 | EU749375 | EU750524              | EU676983 | EU749592 | EU749836 | yes |                            |
| Angiosperm | Rubus allegheniensis       | JAG 0328 (OAC)      | EU750288 | EU749148 | EU749377 | EU750526              | EU676985 | EU749594 | EU749838 | yes |                            |
| Angiosperm | Rubus allegheniensis       | JAG 0387 (OAC)      | EU750287 | EU749147 | EU749376 | EU750525              | EU676984 | EU749593 | EU749837 | yes |                            |
| Angiosperm | Rubus idaeus               | JAG 0196 (OAC)      | EU750293 | EU749153 | EU749382 | EU750531              | EU676990 | EU749599 | EU749843 | yes |                            |
| Angiosperm | Rubus idaeus               | JAG 0217 (OAC)      | EU750291 | EU749151 | EU749380 | EU750529              | EU676988 | EU749597 | EU749841 | yes |                            |
| Angiosperm | Rubus idaeus               | JAG 0262 (OAC)      | EU750289 | EU749149 | EU749378 | EU750527              | EU676986 | EU749595 | EU749839 | yes |                            |
| Angiosperm | Rubus idaeus               | JAG 0309 (OAC)      | EU750290 | EU749150 | EU749379 | EU750528              | EU676987 | EU749596 | EU749840 | yes |                            |
| Angiosperm | Rubus idaeus               | JAG 0384 (OAC)      | EU750292 | EU749152 | EU749381 | EU750530              | EU676989 | EU749598 | EU749842 | yes |                            |
| Angiosperm | Rubus occidentalis         | AP178 (OAC)         | EU750294 | EU749154 | EU749383 | EU750532              | EU676991 | EU749600 | EU749844 | yes |                            |
| Angiosperm | Rubus occidentalis         | JAG 0152 (OAC)      | EU750296 | EU749156 | EU749385 | EU750534              | EU676993 | EU749602 | EU749846 | yes |                            |
| Angiosperm | Rubus occidentalis         | JAG 0330 (OAC)      | EU750297 | EU749157 | EU749386 | EU750535              | EU676994 | EU749603 | EU749847 | yes |                            |
| Angiosperm | Rubus occidentalis         | JAG 0363 (OAC)      | EU750295 | EU749155 | EU749384 | EU750533              | EU676992 | EU749601 | EU749845 | yes |                            |
| Angiosperm | Rubus odoratus             | AP138 (OAC)         | EU750299 | EU749159 | EU749388 | EU750537              | EU676996 | EU749605 | EU749849 | yes |                            |
| Angiosperm | Rubus odoratus             | JAG 0253 (OAC)      | EU750298 | EU749158 | EU749387 | EU750536              | EU676995 | EU749604 | EU749848 | yes |                            |
| Angiosperm | Rubus rudis                | BM000954722 (BM)    | FJ395838 | FJ395707 | -        | FJ395533,<br>FJ395534 | -        | FJ395342 | NT       | no  |                            |



|            |                       |                    |          |          |          |                    |          |          |          |     |                            |
|------------|-----------------------|--------------------|----------|----------|----------|--------------------|----------|----------|----------|-----|----------------------------|
| Angiosperm | Rumex acetosa         | BM000954798 (BM)   | FJ395766 | FJ395637 | FJ395379 | FJ395473           | FJ395573 | FJ395278 | NT       | no  |                            |
| Angiosperm | Rumex crispus         | BM000954749 (BM)   | -        | FJ395679 | FJ395409 | FJ395508           | -        | -        | NT       | no  |                            |
| Angiosperm | Rumex obtusifolius    | BM000954716 (BM)   | -        | FJ395710 | -        | FJ395536           | -        | -        | NT       | no  |                            |
| Angiosperm | Rumex sanguineus      | BM000954714 (BM)   | FJ395844 | FJ395714 | FJ395432 | FJ395540           | -        | -        | NT       | no  |                            |
| Angiosperm | Rumex x pratensis     | BM000954746 (BM)   | -        | FJ395689 | FJ395416 | -                  | -        | -        | NT       | no  |                            |
| Angiosperm | Sabal tertia          | USBG 000-1065 (US) | GQ249022 | GQ248857 | GQ248196 | GQ248387           | GQ248691 | GQ248049 | -        | no  | Angiosperm - Guelph trials |
| Angiosperm | Sabal minor           | USBG 01-1635 (US)  | GQ249023 | GQ248858 | GQ248197 | GQ248388           | GQ248692 | GQ248050 | -        | no  | Angiosperm - Guelph trials |
| Angiosperm | Salix eriocephala     | AP155 (OAC)        | EU750302 | EU749162 | EU749391 | EU750540           | EU676999 | EU749608 | EU749852 | yes |                            |
| Angiosperm | Salix eriocephala     | JAG 0321 (OAC)     | EU750303 | EU749163 | EU749392 | EU750541           | EU677000 | EU749609 | EU749853 | yes |                            |
| Angiosperm | Salix eriocephala     | JAG 0345 (OAC)     | EU750305 | EU749165 | EU749394 | EU750543           | EU677002 | EU749611 | EU749855 | yes |                            |
| Angiosperm | Salix eriocephala     | JAG 0392 (OAC)     | EU750304 | EU749164 | EU749393 | EU750542           | EU677001 | EU749610 | EU749854 | yes |                            |
| Angiosperm | Salix exigua          | JAG 0325 (OAC)     | EU750306 | EU749166 | EU749395 | EU750544           | EU677003 | EU749612 | EU749856 | yes |                            |
| Angiosperm | Salix exigua          | JAG 0344 (OAC)     | EU750307 | EU749167 | EU749396 | EU750545           | EU677004 | EU749613 | EU749857 | yes |                            |
| Angiosperm | Salix x pendulina     | AP378 (OAC)        | EU750301 | EU749161 | EU749390 | EU750539           | EU676998 | EU749607 | EU749851 | yes |                            |
| Angiosperm | Salix x pendulina     | JAG 0369 (OAC)     | EU750300 | EU749160 | EU749389 | EU750538           | EU676997 | EU749606 | EU749850 | yes |                            |
| Angiosperm | Sambucus nigra        | BM000954723 (BM)   | FJ395837 | FJ395706 | FJ395429 | FJ395531, FJ395532 | FJ395598 | FJ395341 | NT       | no  |                            |
| Angiosperm | Sanicula europea      | BM000954699 (BM)   | FJ395749 | FJ395622 | FJ395370 | FJ395459           | -        | FJ395266 | NT       | no  |                            |
| Angiosperm | Schisandra bicolor    | NMNH 06-8343 (US)  | NT*      | GQ248859 | GQ248198 | GQ248389           | GQ248693 | GQ248051 | GQ248523 | no  | Angiosperm - Guelph trials |
| Angiosperm | Schisandra lancifolia | USDA QLG 062B (US) | EF590660 | GQ248860 | GQ248199 | GQ248390           | GQ248694 | GQ248052 | GQ248524 | yes | Angiosperm - Guelph trials |
| Angiosperm | Senecio erucifolius   | BM000954708 (BM)   | FJ395750 | FJ395623 | FJ395371 | FJ395460           | FJ395566 | FJ395267 | NT       | no  |                            |
| Angiosperm | Senecio jacobaea      | BM000954702 (BM)   | FJ395735 | -        | FJ395360 | FJ395449           | -        | FJ395250 | NT       | no  |                            |
| Angiosperm | Senecio vulgaris      | BM000954782 (BM)   | FJ395780 | FJ395649 | FJ395385 | FJ395482           | FJ395580 | FJ395290 | NT       | no  |                            |
| Angiosperm | Silene latifolia      | AP176 (OAC)        | EU750308 | EU749168 | EU749397 | EU750546           | EU677005 | EU749614 | EU749858 | yes |                            |
| Angiosperm | Silene latifolia      | JAG 0094 (OAC)     | EU750309 | EU749169 | EU749398 | EU750547           | EU677006 | EU749615 | EU749859 | yes |                            |
| Angiosperm | Silene vulgaris       | AP110 (OAC)        | EU750310 | EU749170 | EU749399 | EU750548           | EU677007 | EU749616 | EU749860 | yes |                            |
| Angiosperm | Silene vulgaris       | JAG 0229 (OAC)     | EU750312 | EU749172 | EU749401 | EU750550           | EU677009 | EU749618 | EU749862 | yes |                            |
| Angiosperm | Silene vulgaris       | JAG 0264 (OAC)     | EU750311 | EU749171 | EU749400 | EU750549           | EU677008 | EU749617 | EU749861 | yes |                            |
| Angiosperm | Sisymbrium officinale | BM000954704 (BM)   | FJ395734 | FJ395609 | FJ395359 | FJ395448           | -        | FJ395249 | NT       | no  |                            |
| Angiosperm | Solanum dulcamara     | AP136 (OAC)        | EU750313 | EU749173 | EU749402 | EU750551           | EU677010 | EU749619 | EU749863 | yes |                            |
| Angiosperm | Solanum dulcamara     | BM000954677 (BM)   | FJ395858 | FJ395728 | FJ395444 | FJ395554           | FJ395606 | FJ395356 | NT       | no  |                            |
| Angiosperm | Solanum dulcamara     | JAG 0418 (OAC)     | EU750315 | EU749175 | EU749404 | EU750553           | EU677012 | EU749621 | EU749865 | yes |                            |
| Angiosperm | Solanum dulcamara     | JAG 0433 (OAC)     | EU750314 | EU749174 | EU749403 | EU750552           | EU677011 | EU749620 | EU749864 | yes |                            |
| Angiosperm | Solanum nigrum        | AP297 (OAC)        | EU750317 | EU749177 | EU749406 | EU750555           | EU677014 | EU749623 | EU749867 | yes |                            |
| Angiosperm | Solanum nigrum        | JAG 0358 (OAC)     | EU750316 | EU749176 | EU749405 | EU750554           | EU677013 | EU749622 | EU749866 | yes |                            |
| Angiosperm | Solanum nigrum        | JAG 0395 (OAC)     | EU750318 | EU749178 | EU749407 | EU750556           | EU677015 | EU749624 | EU749868 | yes |                            |
| Angiosperm | Solanum panduriforme  | OM1115(KNP)        | EU214021 | EU213684 | EU214285 | EU213851           | EU213513 | EU626869 | EU626968 | yes |                            |
| Angiosperm | Solanum panduriforme  | OM326(JRAU)        | EU214022 | EU213685 | EU214286 | EU213852           | EU213514 | EU626870 | EU626969 | yes |                            |
| Angiosperm | Solanum panduriforme  | OM350(JRAU)        | EU214023 | EU213686 | EU214287 | EU213853           | EU213515 | EU626871 | EU626970 | yes |                            |
| Angiosperm | Solidago altissima    | AP395 (OAC)        | EU750322 | EU749182 | EU749411 | EU750560           | EU677019 | EU749628 | EU749872 | yes |                            |
| Angiosperm | Solidago altissima    | JAG 0234 (OAC)     | EU750320 | EU749180 | EU749409 | EU750558           | EU677017 | EU749626 | EU749870 | yes |                            |
| Angiosperm | Solidago altissima    | JAG 0261 (OAC)     | EU750319 | EU749179 | EU749408 | EU750557           | EU677016 | EU749625 | EU749869 | yes |                            |

|            |                                    |                        |          |          |          |          |          |          |          |     |                            |
|------------|------------------------------------|------------------------|----------|----------|----------|----------|----------|----------|----------|-----|----------------------------|
| Angiosperm | <i>Solidago altissima</i>          | JAG 0314 (OAC)         | EU750321 | EU749181 | EU749410 | EU750559 | EU677018 | EU749627 | EU749871 | yes |                            |
| Angiosperm | <i>Solidago caesia</i>             | AP385 (OAC)            | EU750324 | EU749184 | EU749413 | EU750562 | EU677021 | EU749630 | EU749874 | yes |                            |
| Angiosperm | <i>Solidago caesia</i>             | JAG 0140 (OAC)         | EU750323 | EU749183 | EU749412 | EU750561 | EU677020 | EU749629 | EU749873 | yes |                            |
| Angiosperm | <i>Solidago canadensis</i>         | AP240 (OAC)            | EU750326 | EU749186 | EU749415 | EU750564 | EU677023 | EU749632 | EU749876 | yes |                            |
| Angiosperm | <i>Solidago canadensis</i>         | JAG 0101 (OAC)         | EU750325 | EU749185 | EU749414 | EU750563 | EU677022 | EU749631 | EU749875 | yes |                            |
| Angiosperm | <i>Solidago flexicaulis</i>        | AP334 (OAC)            | EU750328 | EU749188 | EU749417 | EU750566 | EU677025 | EU749634 | EU749878 | yes |                            |
| Angiosperm | <i>Solidago flexicaulis</i>        | JAG 0436 (OAC)         | EU750327 | EU749187 | EU749416 | EU750565 | EU677024 | EU749633 | EU749877 | yes |                            |
| Angiosperm | <i>Solidago nemoralis</i>          | AP393 (OAC)            | EU750331 | EU749191 | EU749420 | EU750569 | EU677028 | EU749637 | EU749881 | yes |                            |
| Angiosperm | <i>Solidago nemoralis</i>          | JAG 0240 (OAC)         | EU750329 | EU749189 | EU749418 | EU750567 | EU677026 | EU749635 | EU749879 | yes |                            |
| Angiosperm | <i>Solidago nemoralis</i>          | JAG 0279 (OAC)         | EU750330 | EU749190 | EU749419 | EU750568 | EU677027 | EU749636 | EU749880 | yes |                            |
| Angiosperm | <i>Solidago rugosa</i>             | JAG 0331 (OAC)         | EU750334 | EU749194 | EU749423 | EU750572 | EU677031 | EU749640 | EU749884 | yes |                            |
| Angiosperm | <i>Solidago rugosa</i>             | JAG 0383 (OAC)         | EU750333 | EU749193 | EU749422 | EU750571 | EU677030 | EU749639 | EU749883 | yes |                            |
| Angiosperm | <i>Solidago rugosa</i>             | JAG 0400 (OAC)         | EU750332 | EU749192 | EU749421 | EU750570 | EU677029 | EU749638 | EU749882 | yes |                            |
| Angiosperm | <i>Sonchus asper</i>               | AP421 (OAC)            | EU750337 | EU749197 | EU749426 | EU750575 | EU677034 | EU749643 | EU749887 | yes |                            |
| Angiosperm | <i>Sonchus asper</i>               | BM000954740 (BM)       | FJ395812 | FJ395682 | FJ395412 | FJ395510 | -        | FJ395320 | NT       | no  |                            |
| Angiosperm | <i>Sonchus asper</i>               | JAG 0412 (OAC)         | EU750335 | EU749195 | EU749424 | EU750573 | EU677032 | EU749641 | EU749885 | yes |                            |
| Angiosperm | <i>Sonchus asper</i>               | JAG 0420 (OAC)         | EU750336 | EU749196 | EU749425 | EU750574 | EU677033 | EU749642 | EU749886 | yes |                            |
| Angiosperm | <i>Sonchus oleraceus</i>           | JAG 0432 (OAC)         | EU750338 | EU749198 | EU749427 | EU750576 | EU677035 | EU749644 | EU749888 | yes |                            |
| Angiosperm | <i>Sonchus oleraceus</i>           | JAG 0708 (OAC)         | EU750339 | -        | -        | EU750577 | EU677036 | EU749645 | EU749889 | no  |                            |
| Angiosperm | <i>Sophora microphylla</i>         | Chase 16089 (K)        | GQ249024 | GQ248861 | GQ248200 | GQ248391 | GQ248695 | GQ248053 | GQ248525 | yes | Angiosperm - Guelph trials |
| Angiosperm | <i>Sophora toromiro</i>            | Maunder M. 6993        | GQ249025 | GQ248862 | GQ248201 | GQ248392 | GQ248696 | GQ248054 | GQ248526 | yes | Angiosperm - Guelph trials |
| Angiosperm | <i>Sophora toromiro</i>            | Chase 747 (K)          | AM889937 | AM889846 | -        | NT       | NT       | NT       | NT       | no  |                            |
| Angiosperm | <i>Sorbus aria</i>                 | BM000954684 (BM)       | FJ395760 | FJ395631 | -        | FJ395468 | -        | -        | NT       | no  |                            |
| Angiosperm | <i>Sorbus aria</i>                 | 2000.009.104 (NMW)     | GQ249026 | GQ248863 | GQ248202 | -        | GQ248697 | GQ248055 | GQ248527 | no  | Angiosperm - Guelph trials |
| Angiosperm | <i>Sorbus rupicola</i>             | 2000.009.106 (NMW)     | GQ249027 | GQ248864 | GQ248203 | -        | GQ248698 | GQ248056 | GQ248528 | no  | Angiosperm - Guelph trials |
| Angiosperm | <i>Stachys sylvatica</i>           | BM000954687 (BM)       | FJ395850 | FJ395720 | FJ395437 | FJ395546 | FJ395603 | FJ395351 | NT       | no  |                            |
| Angiosperm | <i>Steganotaenia araliacea</i>     | OM1350(JRAU)           | EU214024 | EU213687 | EU214288 | EU213854 | EU213516 | EU626872 | EU626971 | yes |                            |
| Angiosperm | <i>Steganotaenia araliacea</i>     | OM1517(JRAU)           | EU214025 | EU213688 | EU214289 | EU213855 | EU213517 | EU626873 | EU626972 | yes |                            |
| Angiosperm | <i>Steganotaenia araliacea</i>     | OM566(JRAU)            | EU214026 | EU213689 | EU214290 | EU213856 | EU213518 | EU626874 | EU626973 | yes |                            |
| Angiosperm | <i>Stellaria graminea</i>          | BM000954800 (BM)       | FJ395765 | FJ395636 | FJ395378 | FJ395472 | FJ395572 | FJ395277 | NT       | no  |                            |
| Angiosperm | <i>Stellaria holostea</i>          | BM000954796 (BM)       | FJ395768 | FJ395639 | -        | FJ395475 | FJ395575 | FJ395280 | NT       | no  |                            |
| Angiosperm | <i>Stephanodaphne cremostachya</i> | Toliara 13.01.1990 (K) | GQ249028 | GQ248865 | GQ248204 | GQ248393 | GQ248699 | GQ248057 | GQ248529 | yes | Angiosperm - Guelph trials |
| Angiosperm | <i>Stephanodaphne cremostachya</i> | Rogers et al. 94 (MO)  | -        | AM889849 | -        | NT       | NT       | NT       | NT       | no  |                            |
| Angiosperm | <i>Stephanodaphne oblongifolia</i> | Rogers et al. 127 (MO) | GQ249029 | GQ248866 | GQ248205 | GQ248394 | GQ248700 | GQ248058 | GQ248530 | yes | Angiosperm - Guelph trials |
| Angiosperm | <i>Striga elegans</i>              | OM683(JRAU)            | EU214027 | EU213690 | EU214291 | -        | EU213519 | EU626875 | EU626974 | no  |                            |
| Angiosperm | <i>Strychnos decussata</i>         | OM900(JRAU)            | EU214028 | EU213691 | EU214292 | EU213857 | EU213520 | EU626876 | EU626975 | yes |                            |
| Angiosperm | <i>Strychnos decussata</i>         | RL1560(KNP)            | EU214029 | EU213692 | EU214293 | EU213858 | EU213521 | EU626877 | EU626976 | yes |                            |
| Angiosperm | <i>Strychnos decussata</i>         | RL1561(KNP)            | EU214030 | EU213693 | EU214294 | EU213859 | EU213522 | EU626878 | EU626977 | yes |                            |
| Angiosperm | <i>Strychnos</i>                   | RL1433(KNP)            | EU214031 | EU213694 | EU214295 | EU213860 | EU213523 | EU626879 | EU626978 | yes |                            |

|            |                              |                |          |          |          |          |          |          |          |     |                            |
|------------|------------------------------|----------------|----------|----------|----------|----------|----------|----------|----------|-----|----------------------------|
|            | madagascariensis             |                |          |          |          |          |          |          |          |     |                            |
| Angiosperm | Strychnos madagascariensis   | RL1460(KNP)    | EU214032 | EU213695 | EU214296 | EU213861 | EU213524 | EU626880 | EU626979 | yes |                            |
| Angiosperm | Strychnos madagascariensis   | RL1559(KNP)    | EU214033 | EU213696 | EU214297 | EU213862 | EU213525 | EU626881 | EU626980 | yes |                            |
| Angiosperm | Strychnos spinosa            | OM220(JRAU)    | EU214034 | EU213697 | EU214298 | EU213863 | EU213526 | EU626882 | EU626981 | yes |                            |
| Angiosperm | Strychnos spinosa            | RL1346(KNP)    | EU214035 | EU213698 | EU214299 | EU213864 | EU213527 | EU626883 | EU626982 | yes |                            |
| Angiosperm | Strychnos spinosa            | RL1652(KNP)    | EU214036 | EU213699 | EU214300 | EU213865 | EU213528 | EU626884 | EU626983 | yes |                            |
| Angiosperm | Symphyotrichum ciliolatum    | AP339 (OAC)    | EU750341 | EU749200 | EU749429 | EU750579 | EU677038 | EU749647 | EU749891 | yes |                            |
| Angiosperm | Symphyotrichum ciliolatum    | JAG 0232 (OAC) | EU750340 | EU749199 | EU749428 | EU750578 | EU677037 | EU749646 | EU749890 | yes |                            |
| Angiosperm | Symphyotrichum ciliolatum    | JAG 0396 (OAC) | EU750342 | EU749201 | EU749430 | EU750580 | EU677039 | EU749648 | EU749892 | yes |                            |
| Angiosperm | Symphyotrichum ericoides     | JAG 0283 (OAC) | EU750344 | EU749203 | EU749432 | EU750582 | EU677041 | EU749650 | EU749894 | yes |                            |
| Angiosperm | Symphyotrichum ericoides     | JAG 0368 (OAC) | EU750343 | EU749202 | EU749431 | EU750581 | EU677040 | EU749649 | EU749893 | yes |                            |
| Angiosperm | Symphyotrichum lanceolatum   | JAG 0280 (OAC) | EU750345 | EU749204 | EU749433 | EU750583 | EU677042 | EU749651 | EU749895 | yes |                            |
| Angiosperm | Symphyotrichum lanceolatum   | JAG 0312 (OAC) | EU750346 | EU749205 | EU749434 | EU750584 | EU677043 | EU749652 | EU749896 | yes |                            |
| Angiosperm | Symphyotrichum lateriflorum  | AP307 (OAC)    | EU750350 | EU749209 | EU749438 | EU750588 | EU677047 | EU749656 | EU749900 | yes |                            |
| Angiosperm | Symphyotrichum lateriflorum  | AP357 (OAC)    | EU750347 | EU749206 | EU749435 | EU750585 | EU677044 | EU749653 | EU749897 | yes |                            |
| Angiosperm | Symphyotrichum lateriflorum  | JAG 0230 (OAC) | EU750348 | EU749207 | EU749436 | EU750586 | EU677045 | EU749654 | EU749898 | yes |                            |
| Angiosperm | Symphyotrichum lateriflorum  | JAG 0329 (OAC) | EU750349 | EU749208 | EU749437 | EU750587 | EU677046 | EU749655 | EU749899 | yes |                            |
| Angiosperm | Symphyotrichum novae-angliae | AP401 (OAC)    | EU750354 | EU749213 | EU749442 | EU750592 | EU677051 | EU749660 | EU749904 | yes |                            |
| Angiosperm | Symphyotrichum novae-angliae | JAG 0275 (OAC) | EU750352 | EU749211 | EU749440 | EU750590 | EU677049 | EU749658 | EU749902 | yes |                            |
| Angiosperm | Symphyotrichum novae-angliae | JAG 0311 (OAC) | EU750351 | EU749210 | EU749439 | EU750589 | EU677048 | EU749657 | EU749901 | yes |                            |
| Angiosperm | Symphyotrichum novae-angliae | JAG 0380 (OAC) | EU750353 | EU749212 | EU749441 | EU750591 | EU677050 | EU749659 | EU749903 | yes |                            |
| Angiosperm | Symphyotrichum pilosum       | JAG 0364 (OAC) | EU750355 | EU749214 | EU749443 | EU750593 | EU677052 | EU749661 | EU749905 | yes |                            |
| Angiosperm | Symphyotrichum pilosum       | JAG 0379 (OAC) | EU750356 | EU749215 | EU749444 | EU750594 | EU677053 | EU749662 | EU749906 | yes |                            |
| Angiosperm | Symphyotrichum urophyllum    | JAG 0144 (OAC) | EU750358 | EU749217 | EU749446 | EU750596 | EU677055 | EU749664 | EU749908 | yes |                            |
| Angiosperm | Symphyotrichum urophyllum    | JAG 0398 (OAC) | EU750357 | EU749216 | EU749445 | EU750595 | EU677054 | EU749663 | EU749907 | yes |                            |
| Angiosperm | Syzygium furfuraceum         | WP1C1287 (US)  | GQ249030 | GQ248867 | GQ248206 | GQ248395 | GQ248701 | GQ248059 | -        | no  | Angiosperm - Guelph trials |
| Angiosperm | Syzygium longipes            | WP2C0346 (US)  | GQ249031 | GQ248868 | GQ248207 | GQ248396 | GQ248702 | GQ248060 | -        | no  | Angiosperm - Guelph        |

|            |                                                         |                           |          |          |          |          |          |          |          |     |  |                            |
|------------|---------------------------------------------------------|---------------------------|----------|----------|----------|----------|----------|----------|----------|-----|--|----------------------------|
|            |                                                         |                           |          |          |          |          |          |          |          |     |  | trials                     |
| Angiosperm | <i>Tacca chantrieri</i>                                 | NMNH 02-027               | EF590663 | EF590489 | -        | EF590744 | EF590577 | -        | -        | no  |  |                            |
| Angiosperm | <i>Tacca integrifolia</i>                               | NMNH 02-029               | EF590664 | EF590490 | -        | EF590745 | EF590578 | -        | -        | no  |  |                            |
| Angiosperm | <i>Tamus communis</i>                                   | BM000954700 (BM)          | FJ395848 | FJ395718 | FJ395436 | FJ395544 | FJ395602 | FJ395350 | NT       | no  |  |                            |
| Angiosperm | <i>Tapinanthus Blume</i>                                | OM825(JRAU)               | EU214037 | EU213700 | EU214301 | -        | EU213529 | EU626885 | EU626984 | no  |  |                            |
| Angiosperm | <i>Taraxacum officinale</i><br>agg                      | BM000954801 (BM)          | FJ395764 | FJ395635 | FJ395377 | FJ395471 | FJ395571 | FJ395276 | NT       | no  |  |                            |
| Angiosperm | <i>Terminalia complanata</i>                            | WP1C0061 (US)             | GQ249034 | GQ248869 | GQ248208 | GQ248398 | GQ248704 | GQ248063 | GQ248531 | yes |  | Angiosperm - Guelph trials |
| Angiosperm | <i>Terminalia kaernbachii</i>                           | WP1D0190 (US)             | -        | -        | -        | -        | -        | -        | -        | no  |  | Angiosperm - Guelph trials |
| Angiosperm | <i>Tilia x europea</i>                                  | BM000954720 (BM)          | FJ395860 | FJ395729 | FJ395445 | -        | -        | -        | NT       | no  |  |                            |
| Angiosperm | <i>Torilis japonica</i>                                 | BM000954690 (BM)          | FJ395740 | FJ395614 | -        | FJ395453 | FJ395562 | FJ395257 | NT       | no  |  |                            |
| Angiosperm | <i>Tragopogon pratensis</i>                             | BM000954671 (BM)          | FJ395857 | FJ395727 | FJ395443 | FJ395553 | -        | FJ395355 | NT       | no  |  |                            |
| Angiosperm | <i>Trifolium dubium</i>                                 | BM000954728 (BM)          | FJ395833 | FJ395702 | FJ395427 | FJ395527 | -        | FJ395338 | NT       | no  |  |                            |
| Angiosperm | <i>Trifolium pratense</i>                               | AP180 (OAC)               | EU750359 | EU749218 | EU749447 | EU750597 | EU677056 | EU749665 | EU749909 | yes |  |                            |
| Angiosperm | <i>Trifolium pratense</i>                               | BM000954780 (BM)          | FJ395778 | FJ395647 | FJ395384 | FJ395480 | FJ395579 | FJ395288 | NT       | no  |  |                            |
| Angiosperm | <i>Trifolium pratense</i>                               | JAG 0224 (OAC)            | EU750361 | EU749220 | EU749449 | EU750599 | EU677058 | EU749667 | EU749911 | yes |  |                            |
| Angiosperm | <i>Trifolium pratense</i>                               | JAG 0291 (OAC)            | EU750360 | EU749219 | EU749448 | EU750598 | EU677057 | EU749666 | EU749910 | yes |  |                            |
| Angiosperm | <i>Trifolium repens</i>                                 | AP181 (OAC)               | EU750362 | EU749221 | EU749450 | EU750600 | EU677059 | EU749668 | EU749912 | yes |  |                            |
| Angiosperm | <i>Trifolium repens</i>                                 | BM000954715 (BM)          | FJ395841 | FJ395711 | -        | FJ395537 | FJ395599 | FJ395344 | NT       | no  |  |                            |
| Angiosperm | <i>Trifolium repens</i>                                 | JAG 0124 (OAC)            | EU750363 | EU749222 | EU749451 | EU750601 | EU677060 | EU749669 | EU749913 | yes |  |                            |
| Angiosperm | <i>Trifolium repens</i>                                 | JAG 0428 (OAC)            | EU750364 | EU749223 | EU749452 | EU750602 | EU677061 | EU749670 | EU749914 | yes |  |                            |
| Angiosperm | <i>Typha angustifolia</i>                               | AP370 (OAC)               | EU750366 | EU749225 | EU749454 | EU750604 | EU677063 | EU749672 | EU749916 | yes |  |                            |
| Angiosperm | <i>Typha angustifolia</i>                               | JAG 0274 (OAC)            | EU750365 | EU749224 | EU749453 | EU750603 | EU677062 | EU749671 | EU749915 | yes |  |                            |
| Angiosperm | <i>Typha latifolia</i>                                  | AP229 (OAC)               | EU750367 | EU749226 | EU749455 | EU750605 | EU677064 | EU749673 | EU749917 | yes |  |                            |
| Angiosperm | <i>Typha latifolia</i>                                  | JAG 0284 (OAC)            | EU750368 | EU749227 | EU749456 | EU750606 | EU677065 | EU749674 | EU749918 | yes |  |                            |
| Angiosperm | <i>Ulmus glabra</i>                                     | BM000954751 (BM)          | FJ395813 | FJ395683 | -        | -        | -        | -        | NT       | no  |  |                            |
| Angiosperm | <i>Ulmus procera</i>                                    | BM000954750 (BM)          | FJ395815 | FJ395685 | -        | -        | -        | FJ395322 | NT       | no  |  |                            |
| Angiosperm | <i>Urtica dioica</i>                                    | BM000954711 (BM)          | FJ395845 | FJ395715 | FJ395433 | FJ395541 | FJ395600 | FJ395347 | NT       | no  |  |                            |
| Angiosperm | <i>Vella pseudocytisus</i><br>ssp. <i>pau</i>           | Mateo 5-V-9 (K,<br>ABH)   | GQ249035 | GQ248870 | GQ248209 | GQ248399 | GQ248705 | GQ248064 | GQ248532 | yes |  | Angiosperm - Guelph trials |
| Angiosperm | <i>Vella pseudocytisus</i><br>ssp. <i>pseudocytisus</i> | Arán 30-IV-88 (K,<br>ABH) | GQ249036 | GQ248871 | GQ248210 | GQ248400 | GQ248706 | GQ248065 | GQ248533 | yes |  | Angiosperm - Guelph trials |
| Angiosperm | <i>Veronica chamaedrys</i>                              | BM000954779 (BM)          | FJ395783 | FJ395652 | FJ395387 | -        | FJ395581 | FJ395293 | NT       | no  |  |                            |
| Angiosperm | <i>Veronica chamaedrys</i>                              | BM000954805 (BM)          | FJ395861 | FJ395730 | FJ395446 | -        | FJ395608 | FJ395357 | NT       | no  |  |                            |
| Angiosperm | <i>Viburnum acerifolium</i>                             | AP102 (OAC)               | EU750369 | EU749228 | EU749457 | EU750607 | EU677066 | EU749675 | EU749919 | yes |  |                            |
| Angiosperm | <i>Viburnum acerifolium</i>                             | JAG 0057 (OAC)            | EU750370 | EU749229 | EU749458 | EU750608 | EU677067 | EU749676 | EU749920 | yes |  |                            |
| Angiosperm | <i>Viburnum contifolium</i>                             | USDA63028 (US)            | GQ249037 | GQ248872 | GQ248211 | GQ248401 | GQ248707 | GQ248066 | GQ248534 | yes |  | Angiosperm - Guelph trials |
| Angiosperm | <i>Viburnum lentago</i>                                 | AP271 (OAC)               | EU750372 | EU749231 | EU749460 | EU750610 | EU677069 | EU749678 | EU749922 | yes |  |                            |
| Angiosperm | <i>Viburnum lentago</i>                                 | JAG 0146 (OAC)            | EU750371 | EU749230 | EU749459 | EU750609 | EU677068 | EU749677 | EU749921 | yes |  |                            |
| Angiosperm | <i>Viburnum opulus</i>                                  | AP076 (OAC)               | EU750373 | EU749232 | EU749461 | EU750611 | EU677070 | EU749679 | EU749923 | yes |  |                            |
| Angiosperm | <i>Viburnum opulus</i>                                  | JAG 0148 (OAC)            | EU750374 | EU749233 | EU749462 | EU750612 | EU677071 | EU749680 | EU749924 | yes |  |                            |
| Angiosperm | <i>Viburnum setigerum</i>                               | USDA29609 (US)            | GQ249038 | GQ248873 | GQ248212 | EF590749 | GQ248708 | GQ248067 | GQ248535 | yes |  | Angiosperm - Guelph trials |

|            |                                |                                         |          |          |          |          |          |          |          |     |                            |
|------------|--------------------------------|-----------------------------------------|----------|----------|----------|----------|----------|----------|----------|-----|----------------------------|
| Angiosperm | <i>Vicia sepium</i>            | BM000954739 (BM)                        | FJ395814 | FJ395684 | -        | FJ395511 | FJ395590 | FJ395321 | NT       | no  |                            |
| Angiosperm | <i>Vicia tetrasperma</i>       | BM000954738 (BM)                        | FJ395827 | FJ395697 | -        | FJ395522 | FJ395595 | FJ395333 | NT       | no  |                            |
| Angiosperm | <i>Viola reichenbachiana</i>   | BM000954791 (BM)                        | FJ395774 | -        | -        | -        | -        | -        | NT       | no  |                            |
| Angiosperm | <i>Vulpia bromoides</i>        | BM000954737 (BM)                        | FJ395809 | FJ395678 | FJ395408 | FJ395507 | -        | FJ395317 | NT       | no  |                            |
| Angiosperm | <i>Weinmannia fraxinea</i>     | Chase 1234 (K)                          | GQ249039 | GQ248874 | GQ248213 | GQ248402 | GQ248709 | GQ248068 | GQ248536 | yes | Angiosperm - Guelph trials |
| Angiosperm | <i>Weinmannia</i> sp.          | Lewis ER 2789 (LOJA)                    | GQ249040 | GQ248875 | GQ248214 | GQ248403 | GQ248710 | GQ248069 | GQ248537 | yes | Angiosperm - Guelph trials |
| Angiosperm | <i>Xerophyta retinervis</i>    | OM1213(KNP)                             | EU214038 | EU213701 | EU214302 | EU213866 | EU213530 | EU626886 | EU626985 | yes |                            |
| Angiosperm | <i>Xerophyta retinervis</i>    | OM516(JRAU)                             | EU214039 | EU213702 | EU214303 | EU213867 | EU213531 | EU626887 | EU626986 | yes |                            |
| Angiosperm | <i>Xerophyta retinervis</i>    | OM562(JRAU)                             | EU214040 | EU213703 | EU214304 | EU213868 | EU213532 | EU626888 | EU626987 | yes |                            |
|            |                                |                                         |          |          |          |          |          |          |          |     |                            |
| Gymnosperm | <i>Agathis lanceolata</i>      | Cretinon & Gardner CAGNC24/Am000455 (E) | AM919789 | AM920059 | AM920134 | AM921997 | AM920222 | FJ173458 | -        | no  | Gymnosperm - community     |
| Gymnosperm | <i>Agathis montana</i>         | Cretinon & Gardner CAGNC71/Am000467 (E) | AM919791 | AM920060 | AM920135 | AM921998 | AM920223 | -        | -        | no  | Gymnosperm - community     |
| Gymnosperm | <i>Araucaria araucana</i>      | CSIRO 19990741 (E)                      | AM919872 | AM920063 | AM920136 | AM922001 | FJ173660 | FJ173459 | -        | no  | Gymnosperm - community     |
| Gymnosperm | <i>Araucaria bernieri</i>      | Gardner et. al. 669 (E)                 | AM919793 | AM920064 | AM920137 | AM922002 | AM920226 | FJ173460 | -        | no  | Gymnosperm - community     |
| Gymnosperm | <i>Araucaria bernieri</i>      | Gardner et al. 4251 (E)                 | AM919795 | FJ173759 | AM920138 | FJ173518 | FJ173661 | FJ173461 | -        | no  | Gymnosperm - community     |
| Gymnosperm | <i>Araucaria bernieri</i>      | Kettle & Kranitz 302 (E)                | AM919797 | FJ173760 | AM920139 | FJ173519 | FJ173662 | FJ173462 | -        | no  | Gymnosperm - community     |
| Gymnosperm | <i>Araucaria biramulata</i>    | Gardner et al. 4090 (E)                 | AM919800 | FJ173761 | AM920140 | FJ173520 | FJ173663 | FJ173463 | -        | no  | Gymnosperm - community     |
| Gymnosperm | <i>Araucaria biramulata</i>    | Kettle & Kranitz 261 (E)                | AM919801 | FJ173762 | AM920141 | FJ173521 | FJ173664 | FJ173464 | -        | no  | Gymnosperm - community     |
| Gymnosperm | <i>Araucaria biramulata</i>    | Gardner et al. 185 (E)                  | AM919803 | FJ173763 | AM920142 | FJ173522 | FJ173665 | FJ173465 | -        | no  | Gymnosperm - community     |
| Gymnosperm | <i>Araucaria columnaris</i>    | Gardner et al. 833 (E)                  | AM919805 | AM920067 | AM920143 | FJ173453 | AM920229 | FJ173466 | -        | no  | Gymnosperm - community     |
| Gymnosperm | <i>Araucaria columnaris</i>    | Gardner et al. 730 (E)                  | AM919806 | AM920068 | AM920144 | AM922005 | AM920230 | FJ173467 | -        | no  | Gymnosperm - community     |
| Gymnosperm | <i>Araucaria columnaris</i>    | Gardner et al. 5 (E)                    | AM919807 | AM920069 | AM920145 | FJ173524 | AM920231 | FJ173468 | -        | no  | Gymnosperm - community     |
| Gymnosperm | <i>Araucaria cunninghamii</i>  | CSIRO 19762124 (E)                      | AM919878 | AM920070 | AM920146 | AM922006 | AM920232 | FJ173469 | -        | no  | Gymnosperm - community     |
| Gymnosperm | <i>Araucaria cunninghamii</i>  | CSIRO 19762122.A (E)                    | AM919871 | AM920071 | AM920147 | -        | AM920233 | -        | -        | no  | Gymnosperm - community     |
| Gymnosperm | <i>Araucaria heterophylla</i>  | Unknown19885028 (E)                     | AM919873 | AM920072 | AM920148 | FJ173525 | AM920234 | FJ173470 | -        | no  | Gymnosperm - community     |
| Gymnosperm | <i>Araucaria humboldtensis</i> | Gardner et al. 2007 (E)                 | AM919812 | FJ173764 | AM920149 | FJ173526 | FJ173666 | FJ173471 | -        | no  | Gymnosperm - community     |
| Gymnosperm | <i>Araucaria humboldtensis</i> | Gardner et al. 117 (E)                  | AM919813 | FJ173765 | AM920150 | FJ173527 | FJ173667 | FJ173472 | -        | no  | Gymnosperm - community     |
| Gymnosperm | <i>Araucaria hunsteinii</i>    | Gardner 19623223 (E)                    | AM919874 | AM920074 | AM920151 | FJ173528 | AM920236 | FJ173473 | -        | no  | Gymnosperm -               |

|            |                               |                          |          |          |          |          |          |          |   |    |                        |
|------------|-------------------------------|--------------------------|----------|----------|----------|----------|----------|----------|---|----|------------------------|
|            |                               |                          |          |          |          |          |          |          |   |    | community              |
| Gymnosperm | <i>Araucaria laubenfelsii</i> | Gardner et al. 4055 (E)  | AM919817 | AM920075 | AM920152 | FJ173529 | AM920238 | FJ173474 | - | no | Gymnosperm - community |
| Gymnosperm | <i>Araucaria laubenfelsii</i> | Gardner et al. 601 (E)   | AM919819 | FJ173766 | AM920153 | FJ173530 | FJ173668 | FJ173475 | - | no | Gymnosperm - community |
| Gymnosperm | <i>Araucaria luxurians</i>    | Gardner et al. 931 (E)   | AM919823 | AM920076 | AM920155 | FJ173531 | -        | FJ173476 | - | no | Gymnosperm - community |
| Gymnosperm | <i>Araucaria luxurians</i>    | Kettle & Kranitz 55 (E)  | AM919825 | FJ173767 | AM920156 | FJ173532 | FJ173669 | FJ173477 | - | no | Gymnosperm - community |
| Gymnosperm | <i>Araucaria luxurians</i>    | Gardner et al. 4016 (E)  | AM919827 | FJ173768 | AM920157 | FJ173533 | AM920239 | FJ173478 | - | no | Gymnosperm - community |
| Gymnosperm | <i>Araucaria montana</i>      | Gardner et al. 4132 (E)  | AM919821 | FJ173769 | AM920154 | FJ173534 | FJ173670 | FJ173479 | - | no | Gymnosperm - community |
| Gymnosperm | <i>Araucaria montana</i>      | Gardner et al. 4243 (E)  | AM919829 | FJ173770 | AM920158 | FJ173535 | FJ173671 | FJ173480 | - | no | Gymnosperm - community |
| Gymnosperm | <i>Araucaria montana</i>      | Kettle & Kranitz 46 (E)  | AM919831 | FJ173771 | AM920159 | FJ173536 | FJ173672 | FJ173481 | - | no | Gymnosperm - community |
| Gymnosperm | <i>Araucaria montana</i>      | Gardner et al. 260 (E)   | AM919833 | AM920077 | AM920160 | FJ173537 | AM920241 | FJ173482 | - | no | Gymnosperm - community |
| Gymnosperm | <i>Araucaria muelleri</i>     | Gardner et al. 653 (E)   | AM919835 | AM920078 | AM920161 | AM922009 | AM920242 | FJ173483 | - | no | Gymnosperm - community |
| Gymnosperm | <i>Araucaria muelleri</i>     | Gardner et al. 3002 (E)  | AM919836 | AM920079 | AM920162 | AM922010 | AM920243 | FJ173484 | - | no | Gymnosperm - community |
| Gymnosperm | <i>Araucaria muelleri</i>     | Gardner et al. 870 (E)   | AM919837 | AM920080 | AM920163 | FJ173538 | AM920244 | FJ173485 | - | no | Gymnosperm - community |
| Gymnosperm | <i>Araucaria nemorosa</i>     | Kettle & Kranitz 366 (E) | AM919841 | AM920081 | AM920164 | FJ173539 | AM920245 | FJ173486 | - | no | Gymnosperm - community |
| Gymnosperm | <i>Araucaria nemorosa</i>     | Gardner et al. 4013 (E)  | AM919842 | AM920082 | AM920165 | AM922011 | AM920246 | FJ173487 | - | no | Gymnosperm - community |
| Gymnosperm | <i>Araucaria nemorosa</i>     | Kettle & Kranitz 93 (E)  | AM919843 | AM920083 | AM920166 | FJ173540 | AM920247 | -        | - | no | Gymnosperm - community |
| Gymnosperm | <i>Araucaria rulei</i>        | Gardner et al. 312 (E)   | AM919850 | AM920086 | AM920167 | AM922013 | AM920249 | FJ173488 | - | no | Gymnosperm - community |
| Gymnosperm | <i>Araucaria rulei</i>        | Gardner et al. 241 (E)   | AM919851 | AM920087 | AM920168 | FJ173541 | AM920250 | FJ173489 | - | no | Gymnosperm - community |
| Gymnosperm | <i>Araucaria rulei</i>        | Gardner et al. 39 (E)    | AM919848 | FJ173772 | AM920169 | FJ173542 | FJ173673 | FJ173490 | - | no | Gymnosperm - community |
| Gymnosperm | <i>Araucaria schmidii</i>     | Gardner et al. 4221 (E)  | AM919853 | FJ173773 | AM920170 | FJ173543 | FJ173674 | FJ173491 | - | no | Gymnosperm - community |
| Gymnosperm | <i>Araucaria schmidii</i>     | Gardner et al. 4228 (E)  | AM919854 | AM920088 | AM920171 | FJ173544 | AM920251 | FJ173492 | - | no | Gymnosperm - community |
| Gymnosperm | <i>Araucaria schmidii</i>     | Gardner et al. 4209 (E)  | AM919856 | FJ173774 | AM920172 | FJ173545 | FJ173675 | FJ173493 | - | no | Gymnosperm - community |
| Gymnosperm | <i>Araucaria scopulorum</i>   | Kettle & Kranitz 851 (E) | AM919864 | FJ173775 | AM920173 | FJ173546 | -        | FJ173494 | - | no | Gymnosperm - community |
| Gymnosperm | <i>Araucaria scopulorum</i>   | Gardner et al. 271 (E)   | AM919860 | AM920089 | AM920174 | FJ173547 | AM920252 | FJ173495 | - | no | Gymnosperm - community |
| Gymnosperm | <i>Araucaria scopulorum</i>   | Kettle & Kranitz 333 (E) | AM919863 | FJ173776 | AM920175 | FJ173548 | -        | FJ173496 | - | no | Gymnosperm - community |

|            |                                    |                        |          |          |          |          |          |          |          |     |                        |
|------------|------------------------------------|------------------------|----------|----------|----------|----------|----------|----------|----------|-----|------------------------|
| Gymnosperm | <i>Araucaria subulata</i>          | Gardner et al. 679 (E) | AM919865 | AM920090 | AM920176 | AM922014 | AM920253 | FJ173497 | -        | no  | Gymnosperm - community |
| Gymnosperm | <i>Araucaria subulata</i>          | Gardner et al. 69 (E)  | AM919869 | FJ173777 | AM920178 | FJ173549 | FJ173676 | FJ173498 | -        | no  | Gymnosperm - community |
| Gymnosperm | <i>Encephalartos ferox</i>         | USBG 90-00663A         | EF590613 | -        | -        | EF590694 | EF590526 | -        | -        | no  | Gymnosperm - community |
| Gymnosperm | <i>Encephalartos horridus</i>      | John Winter 28526      | GQ248934 | NT*      | NT*      | GQ248294 | GQ248598 | GQ247956 | NT*      | no  | Gymnosperm - community |
| Gymnosperm | <i>Encephalartos transvenosus</i>  | John Winter 27976      | GQ248935 | NT*      | NT*      | GQ248295 | GQ248599 | GQ247957 | -        | no  | Gymnosperm - community |
| Gymnosperm | <i>Encephalartos umbeluziensis</i> | USBG 90-0666A          | EF590614 | -        | -        | EF590695 | EF590527 | -        | -        | no  | Gymnosperm - community |
| Gymnosperm | <i>Ephedra andina</i>              | Chase 10140 (K)        | AM889885 | -        | -        | -        | -        | -        | -        | no  | Gymnosperm - community |
| Gymnosperm | <i>Ephedra frustillata</i>         | Chase 10218 (K)        | GQ248936 | -        | -        | GQ248296 | GQ248600 | GQ247958 | -        | no  | Gymnosperm - community |
| Gymnosperm | <i>Juniperus communis</i>          | AP204 (OAC)            | EU750375 | EU749234 | EU749463 | EU750613 | EU677072 | EU749681 | EU749925 | yes | Gymnosperm - community |
| Gymnosperm | <i>Juniperus communis</i>          | JAG 0237 (OAC)         | EU750377 | EU749236 | EU749465 | EU750615 | EU677074 | EU749683 | EU749926 | yes | Gymnosperm - community |
| Gymnosperm | <i>Juniperus communis</i>          | JAG 0306 (OAC)         | EU750376 | EU749235 | EU749464 | EU750614 | EU677073 | EU749682 | EU749927 | yes | Gymnosperm - community |
| Gymnosperm | <i>Juniperus communis</i>          | RS149 (OAC)            | EU750378 | EU749237 | EU749466 | EU750616 | EU677075 | EU749684 | -        | no  | Gymnosperm - community |
| Gymnosperm | <i>Juniperus virginiana</i>        | AP394 (OAC)            | EU750381 | EU749240 | EU749469 | EU750619 | EU677078 | EU749687 | EU749928 | yes | Gymnosperm - community |
| Gymnosperm | <i>Juniperus virginiana</i>        | JAG 0307 (OAC)         | EU750379 | EU749238 | EU749467 | EU750617 | EU677076 | EU749685 | EU749929 | yes | Gymnosperm - community |
| Gymnosperm | <i>Juniperus virginiana</i>        | JAG 0349 (OAC)         | EU750380 | EU749239 | EU749468 | EU750618 | EU677077 | EU749686 | -        | no  | Gymnosperm - community |
| Gymnosperm | <i>Juniperus virginiana</i>        | JAG 0413 (OAC)         | EU750382 | EU749241 | EU749470 | EU750620 | EU677079 | EU749688 | -        | no  | Gymnosperm - community |
| Gymnosperm | <i>Picea glauca</i>                | SNEW018_B (OAC)        | -        | EU749245 | -        | EU750624 | EU677083 | EU749692 | EU749933 | no  | Gymnosperm - community |
| Gymnosperm | <i>Picea glauca</i>                | AP263 (OAC)            | EU750383 | EU749242 | EU749471 | EU750621 | EU677080 | EU749689 | EU749930 | yes | Gymnosperm - community |
| Gymnosperm | <i>Picea glauca</i>                | JAG 0161 (OAC)         | EU750384 | EU749243 | EU749472 | EU750622 | EU677081 | EU749690 | EU749931 | yes | Gymnosperm - community |
| Gymnosperm | <i>Picea glauca</i>                | JAG 0204 (OAC)         | EU750385 | EU749244 | EU749473 | EU750623 | EU677082 | EU749691 | EU749932 | yes | Gymnosperm - community |
| Gymnosperm | <i>Picea mariana</i>               | RS186 (OAC)            | EU750386 | EU749247 | EU749475 | EU750626 | EU677085 | EU749694 | EU749935 | yes | Gymnosperm - community |
| Gymnosperm | <i>Picea mariana</i>               | JAG 0171 (OAC)         | -        | EU749246 | EU749474 | EU750625 | EU677084 | EU749693 | EU749934 | no  | Gymnosperm - community |
| Gymnosperm | <i>Pinus banksiana</i>             | AP347 (OAC)            | EU750387 | EU749248 | EU749476 | EU750627 | EU677086 | EU749695 | -        | no  | Gymnosperm - community |
| Gymnosperm | <i>Pinus banksiana</i>             | JAG 0236 (OAC)         | EU750388 | EU749249 | EU749477 | EU750628 | EU677087 | EU749696 | EU749936 | yes | Gymnosperm - community |
| Gymnosperm | <i>Pinus banksiana</i>             | JAG 0921 (OAC)         | GQ273986 | NT*      | NT*      | -        | GQ274317 | GQ274311 | GQ335520 | no  | Gymnosperm - community |

|            |                                             |                    |          |          |          |          |          |          |          |     |                        |
|------------|---------------------------------------------|--------------------|----------|----------|----------|----------|----------|----------|----------|-----|------------------------|
| Gymnosperm | <i>Pinus contorta</i>                       | Chase 3737 (K)     | GQ249000 | AM889835 | -        | GQ248365 | GQ248668 | GQ248025 | GQ248507 | no  | Gymnosperm - community |
| Gymnosperm | <i>Pinus contorta</i> ssp. <i>bolanderi</i> | Chase 3729 (K)     | GQ249001 | AM889834 | -        | -        | GQ248669 | GQ248026 | GQ248508 | no  | Gymnosperm - community |
| Gymnosperm | <i>Pinus parviflora</i>                     | Kress 06-8359 (US) | GQ249002 | -        | -        | GQ248366 | GQ248670 | GQ248027 | GQ248509 | no  | Gymnosperm - community |
| Gymnosperm | <i>Pinus strobus</i>                        | AP328 (OAC)        | EU750391 | EU749252 | EU749480 | EU750631 | EU677090 | EU749699 | EU749939 | yes | Gymnosperm - community |
| Gymnosperm | <i>Pinus strobus</i>                        | JAG 0111 (OAC)     | EU750390 | EU749251 | EU749479 | EU750630 | EU677089 | EU749698 | EU749938 | yes | Gymnosperm - community |
| Gymnosperm | <i>Pinus strobus</i>                        | JAG 0183 (OAC)     | EU750389 | EU749250 | EU749478 | EU750629 | EU677088 | EU749697 | EU749937 | yes | Gymnosperm - community |
| Gymnosperm | <i>Pinus strobus</i>                        | Kress 06-8360 (US) | GQ249003 | NT*      | -        | GQ248367 | GQ248671 | GQ248028 | -        | no  | Gymnosperm - community |
| Gymnosperm | <i>Pinus sylvestris</i>                     | AP414 (OAC)        | EU750394 | EU749255 | EU749483 | EU750634 | EU677093 | EU749702 | EU749942 | yes | Gymnosperm - community |
| Gymnosperm | <i>Pinus sylvestris</i>                     | JAG 0151 (OAC)     | EU750392 | EU749253 | EU749481 | EU750632 | EU677091 | EU749700 | EU749940 | yes | Gymnosperm - community |
| Gymnosperm | <i>Pinus sylvestris</i>                     | JAG 0347 (OAC)     | EU750393 | EU749254 | EU749482 | EU750633 | EU677092 | EU749701 | EU749941 | yes | Gymnosperm - community |
| Gymnosperm | <i>Taxus baccata</i>                        | BM000954680 (BM)   | FJ395859 | -        | -        | -        | FJ395607 | -        | NT       | no  | Gymnosperm - community |
| Gymnosperm | <i>Taxus baccata</i>                        | Kress 06-8280 (US) | GQ249032 | -        | -        | GQ248397 | GQ248703 | GQ248061 | -        | no  | Gymnosperm - community |
| Gymnosperm | <i>Taxus canadensis</i>                     | JAG 0922 (OAC)     | GQ273987 | -        | -        | GQ274315 | GQ274318 | GQ274312 | GQ335521 | no  | Gymnosperm - community |
| Gymnosperm | <i>Taxus cuspidata</i>                      | NMNH 307-9947 (US) | GQ249033 | -        | -        | EF590747 | EF590580 | GQ248062 | -        | no  | Gymnosperm - community |
|            |                                             |                    |          |          |          |          |          |          |          |     |                        |
| cryptogam  | <i>Brachythecium oxycladon</i>              | BRC17 (OAC)        | EU750407 | EU749261 | -        | EU750656 | EU677117 | EU749720 | -        | no  | Cryptogam - community  |
| cryptogam  | <i>Brachythecium oxycladon</i>              | BRC18 (OAC)        | EU750408 | EU749262 | EU749493 | EU750657 | EU677118 | EU749721 | -        | no  | Cryptogam - community  |
| cryptogam  | <i>Brachythecium reflexum</i>               | BRC15 (OAC)        | EU750409 | EU749263 | EU749494 | EU750658 | EU677119 | EU749722 | -        | no  | Cryptogam - community  |
| cryptogam  | <i>Brachythecium reflexum</i>               | BRC16 (OAC)        | EU750410 | EU749264 | EU749495 | EU750659 | EU677120 | EU749723 | -        | no  | Cryptogam - community  |
| cryptogam  | <i>Brachythecium salebrosum</i>             | BRC13 (OAC)        | EU750411 | EU749265 | -        | EU750660 | EU677121 | EU749724 | -        | no  | Cryptogam - community  |
| cryptogam  | <i>Brachythecium salebrosum</i>             | BRC14 (OAC)        | EU750412 | EU749266 | EU749496 | EU750661 | EU677122 | EU749725 | -        | no  | Cryptogam - community  |
| cryptogam  | <i>Dicranum flagellare</i>                  | BRC02 (OAC)        | EU750413 | EU749267 | -        | EU750662 | EU677123 | EU749726 | -        | no  | Cryptogam - community  |
| cryptogam  | <i>Dicranum flagellare</i>                  | BRC03 (OAC)        | EU750414 | EU749268 | -        | EU750663 | EU677124 | EU749727 | -        | no  | Cryptogam - community  |
| cryptogam  | <i>Dicranum flagellare</i>                  | BRC04 (OAC)        | EU750415 | EU749269 | -        | EU750664 | EU677125 | -        | -        | no  | Cryptogam - community  |
| cryptogam  | <i>Dicranum flagellare</i>                  | Allen 7767 (US)    | NT*      | -        | -        | GQ248288 | GQ248591 | GQ247948 | -        | no  | Cryptogam - community  |



|           |                         |                      |          |          |          |          |          |          |          |    |                       |
|-----------|-------------------------|----------------------|----------|----------|----------|----------|----------|----------|----------|----|-----------------------|
| cryptogam | Dicranum polysetum      | BRC01 (OAC)          | EU750416 | EU749270 | -        | EU750665 | EU677126 | EU749728 | -        | no | Cryptogam - community |
| cryptogam | Dicranum polysetum      | GB1 (OAC)            | EU750417 | EU749271 | -        | EU750666 | EU677127 | EU749729 | -        | no | Cryptogam - community |
| cryptogam | Dicranum scoparium      | Allen 21559 (US)     | NT*      | -        | -        | GQ248289 | EF590522 | GQ247949 | NT*      | no | Cryptogam - community |
| cryptogam | Plagiomnium cuspidatum  | BRC09 (OAC)          | EU750418 | EU749272 | EU749497 | EU750667 | EU677128 | EU749730 | -        | no | Cryptogam - community |
| cryptogam | Plagiomnium cuspidatum  | BRC10 (OAC)          | EU750419 | EU749273 | EU749498 | EU750668 | EU677129 | EU749731 | -        | no | Cryptogam - community |
| cryptogam | Plagiomnium drummondii  | BRC11 (OAC)          | EU750420 | EU749274 | EU749499 | EU750669 | EU677130 | EU749732 | -        | no | Cryptogam - community |
| cryptogam | Plagiomnium drummondii  | GB2 (OAC)            | EU750421 | -        | -        | EU750670 | EU677131 | EU749733 | -        | no | Cryptogam - community |
| cryptogam | Polytrichum commune     | BRC05 (OAC)          | EU750422 | EU749275 | -        | EU750671 | EU677132 | EU749734 | -        | no | Cryptogam - community |
| cryptogam | Polytrichum commune     | BRC06 (OAC)          | EU750423 | EU749276 | -        | EU750672 | EU677133 | EU749735 | -        | no | Cryptogam - community |
| cryptogam | Polytrichum commune     | NMNH Eckel 83H5 (US) | -        | -        | -        | EF590730 | EF590564 | GQ248035 | -        | no | Cryptogam - community |
| cryptogam | Polytrichum juniperinum | BRC07 (OAC)          | EU750424 | EU749277 | -        | EU750673 | EU677134 | EU749736 | -        | no | Cryptogam - community |
| cryptogam | Polytrichum juniperinum | BRC08 (OAC)          | EU750425 | EU749278 | -        | EU750674 | EU677135 | EU749737 | -        | no | Cryptogam - community |
| cryptogam | Polytrichum juniperinum | BRC19 (OAC)          | EU750426 | EU749279 | -        | EU750675 | EU677136 | EU749738 | -        | no | Cryptogam - community |
| cryptogam | Polytrichum juniperinum | NMNH 33767 (US)      | NT*      | -        | -        | GQ248374 | GQ248679 | GQ248036 | GQ248515 | no | Cryptogam - community |
| cryptogam | Sphagnum contortum      | NMNH Boles 1738      | EF590662 | -        | -        | EF590743 | EF590576 | -        | -        | no | Cryptogam - community |
| cryptogam | Sphagnum platyphyllum   | NMNH Boles 1644      | EF590661 | -        | -        | EF590742 | EF590575 | -        | -        | no | Cryptogam - community |
|           |                         |                      |          |          |          |          |          |          |          |    |                       |
| cryptogam | Lycopodium digitatum    | JAG 0032 (OAC)       | EU750405 | EU749256 | EU749488 | EU750650 | EU677111 | EU749714 | -        | no | Cryptogam - community |
| cryptogam | Lycopodium digitatum    | JAG 0337 (OAC)       | EU750406 | EU749257 | EU749489 | EU750651 | EU677112 | EU749715 | -        | no | Cryptogam - community |
| cryptogam | Lycopodium obscurum     | AP429 (OAC)          | -        | EU749260 | EU749492 | EU750654 | EU677115 | EU749718 | -        | no | Cryptogam - community |
| cryptogam | Lycopodium obscurum     | JAG 0059 (OAC)       | -        | EU749259 | EU749491 | EU750653 | EU677114 | EU749717 | -        | no | Cryptogam - community |
| cryptogam | Lycopodium obscurum     | JAG 0169 (OAC)       | -        | EU749258 | EU749490 | EU750652 | EU677113 | EU749716 | -        | no | Cryptogam - community |
| cryptogam | Lycopodium obscurum     | RS155 (OAC)          | -        | -        | -        | EU750655 | EU677116 | EU749719 | -        | no | Cryptogam - community |
|           |                         |                      |          |          |          |          |          |          |          |    |                       |
| cryptogam | Asterella africana      | Blokeel Hn251 (E)    | AM920044 | -        | -        | AM922061 | AM920299 | -        | FJ173601 | no | Cryptogam - community |
| cryptogam | Asterella africana      | Schill 29 (E)        | AM920045 | -        | -        | AM922062 | AM920310 | -        | FJ173602 | no | Cryptogam - community |

|           |                                 |                         |          |   |   |          |          |          |          |    |                       |
|-----------|---------------------------------|-------------------------|----------|---|---|----------|----------|----------|----------|----|-----------------------|
|           |                                 |                         |          |   |   |          |          |          |          |    | community             |
| cryptogam | <i>Asterella australis</i>      | Bateman 86 (E)          | AM920050 | - | - | AM922063 | AM920300 | -        | -        | no | Cryptogam - community |
| cryptogam | <i>Asterella bolanderi</i>      | Long 27539, 8a (E)      | AM920053 | - | - | AM922064 | AM920274 | -        | FJ173603 | no | Cryptogam - community |
| cryptogam | <i>Asterella bolanderi</i>      | Doyle 11452 (E)         | AM920051 | - | - | FJ173588 | FJ173677 | NT       | -        | no | Cryptogam - community |
| cryptogam | <i>Asterella californica</i>    | Long 27556 (E)          | AM920049 | - | - | AM922065 | AM920297 | -        | FJ173604 | no | Cryptogam - community |
| cryptogam | <i>Asterella californica</i>    | Doyle 11445 (E)         | FJ173778 | - | - | FJ173589 | FJ173678 | NT       | -        | no | Cryptogam - community |
| cryptogam | <i>Asterella cruciata</i>       | Long 37437 (E)          | FJ173779 | - | - | FJ173590 | FJ173679 | NT       | -        | no | Cryptogam - community |
| cryptogam | <i>Asterella dominicensis</i>   | Long 29615 (E)          | AM920052 | - | - | AM922066 | AM920304 | -        | -        | no | Cryptogam - community |
| cryptogam | <i>Asterella gracilis</i>       | Hugonnot s.n. (E)       | FJ173780 | - | - | FJ173591 | FJ173680 | NT       | -        | no | Cryptogam - community |
| cryptogam | <i>Asterella grollei</i>        | Long 27203 (H37) (E)    | FJ173781 | - | - | FJ173592 | FJ173681 | NT       | -        | no | Cryptogam - community |
| cryptogam | <i>Asterella innovans</i>       | Furuki 15421 (E)        | AM920041 | - | - | AM922067 | AM920307 | -        | FJ173605 | no | Cryptogam - community |
| cryptogam | <i>Asterella khasyana</i>       | Long 30525, 5a (E)      | AM920037 | - | - | AM922068 | AM920279 | FJ173499 | FJ173606 | no | Cryptogam - community |
| cryptogam | <i>Asterella khasyana</i>       | Long 30292 (E)          | AM920005 | - | - | AM922069 | AM920305 | -        | -        | no | Cryptogam - community |
| cryptogam | <i>Asterella khasyana</i>       | Long 35056 (E)          | AM920056 | - | - | AM922070 | AM920308 | -        | FJ173607 | no | Cryptogam - community |
| cryptogam | <i>Asterella khasyana</i>       | Long 28740 (E)          | AM920039 | - | - | FJ173593 | FJ173682 | NT       | -        | no | Cryptogam - community |
| cryptogam | <i>Asterella leptophylla</i>    | Long 35135, 6a (E)      | AM920040 | - | - | AM922071 | AM920278 | -        | FJ173608 | no | Cryptogam - community |
| cryptogam | <i>Asterella leptophylla</i>    | Long 34558 (E)          | FJ173782 | - | - | FJ173594 | FJ173683 | NT       | -        | no | Cryptogam - community |
| cryptogam | <i>Asterella lindenbergiana</i> | Stefanut BUCA B3493 (E) | FJ173783 | - | - | FJ173595 | FJ173684 | NT       | -        | no | Cryptogam - community |
| cryptogam | <i>Asterella macropoda</i>      | Long 32972, 7a (E)      | AM920014 | - | - | -        | FJ173685 | NT       | -        | no | Cryptogam - community |
| cryptogam | <i>Asterella macropoda</i>      | Long 32910 (E)          | AM920013 | - | - | AM922072 | AM920298 | -        | FJ173609 | no | Cryptogam - community |
| cryptogam | <i>Asterella macropoda</i>      | Gradstein 10014 (E)     | FJ173784 | - | - | FJ173596 | FJ173686 | NT       | -        | no | Cryptogam - community |
| cryptogam | <i>Asterella macropoda</i>      | Forrest 545 (ABLS)      | FJ173785 | - | - | FJ173597 | FJ173687 | NT       | -        | no | Cryptogam - community |
| cryptogam | <i>Asterella multiflora</i>     | Long 28935, 10a (E)     | AM920046 | - | - | AM922073 | AM920285 | -        | -        | no | Cryptogam - community |
| cryptogam | <i>Asterella mussuriensis</i>   | Long 28704, 9a (E)      | AM920048 | - | - | AM922074 | AM920284 | -        | FJ173610 | no | Cryptogam - community |
| cryptogam | <i>Asterella mussuriensis</i>   | Long 28584 (E)          | AM920047 | - | - | FJ173598 | FJ173688 | NT       | -        | no | Cryptogam - community |

|           |                                  |                           |          |   |   |          |          |          |          |    |                       |
|-----------|----------------------------------|---------------------------|----------|---|---|----------|----------|----------|----------|----|-----------------------|
| cryptogam | <i>Asterella palmeri</i>         | Doyle 11446 (E)           | AM920015 | - | - | AM922075 | AM920295 | -        | FJ173611 | no | Cryptogam - community |
| cryptogam | <i>Asterella saccata</i>         | Schill 36 (E)             | AM919999 | - | - | AM922076 | AM920296 | -        | FJ173612 | no | Cryptogam - community |
| cryptogam | <i>Asterella saccata</i>         | Ruegsegger s.n. (H89) (E) | FJ173786 | - | - | FJ173599 | FJ173689 | NT       | -        | no | Cryptogam - community |
| cryptogam | <i>Asterella</i> sp.             | Li Zhang s.n. (ABLS)      | FJ173787 | - | - | FJ173600 | FJ173690 | NT       | -        | no | Cryptogam - community |
| cryptogam | <i>Asterella tenella</i>         | Kosma 101 (ABLS)          | FJ173788 | - | - | FJ173550 | FJ173691 | NT       | -        | no | Cryptogam - community |
| cryptogam | <i>Asterella wallichiana</i>     | Long 33525 (E)            | AM919991 | - | - | FJ173551 | FJ173692 | NT       | -        | no | Cryptogam - community |
| cryptogam | <i>Asterella wallichiana</i>     | Long 32565 (E)            | AM920021 | - | - | -        | -        | NT       | -        | no | Cryptogam - community |
| cryptogam | <i>Asterella wallichiana</i>     | Long 28936 (E)            | AM920020 | - | - | FJ173552 | FJ173693 | NT       | -        | no | Cryptogam - community |
| cryptogam | <i>Asterella wallichiana</i>     | Long 25288 (E)            | AM920019 | - | - | FJ173553 | FJ173694 | NT       | -        | no | Cryptogam - community |
| cryptogam | <i>Asterella wallichiana</i>     | Long 28768 (E)            | AM920035 | - | - | AM922077 | AM920294 | -        | FJ173613 | no | Cryptogam - community |
| cryptogam | <i>Asterella wallichiana</i>     | Long 30251 (E)            | AM920036 | - | - | AM922078 | AM920302 | -        | -        | no | Cryptogam - community |
| cryptogam | <i>Asterella wallichiana</i>     | Long 30732 (E)            | AM920030 | - | - | FJ173554 | FJ173695 | NT       | -        | no | Cryptogam - community |
| cryptogam | <i>Asterella wallichiana</i>     | Long 28179 (E)            | AM920038 | - | - | FJ173555 | FJ173696 | NT       | -        | no | Cryptogam - community |
| cryptogam | <i>Cryptomitrium himalayense</i> | Long 30559 (E)            | AM919996 | - | - | -        | FJ173697 | NT       | -        | no | Cryptogam - community |
| cryptogam | <i>Cryptomitrium tenerum</i>     | Doyle 11447 (E)           | FJ173789 | - | - | FJ173556 | FJ173698 | -        | FJ173614 | no | Cryptogam - community |
| cryptogam | <i>Mannia androgyna</i>          | Schill 34 (E)             | AM920016 | - | - | AM922081 | AM920280 | FJ173500 | FJ173615 | no | Cryptogam - community |
| cryptogam | <i>Mannia androgyna</i>          | Schill 124 (E)            | AM920043 | - | - | FJ173557 | FJ173699 | NT       | -        | no | Cryptogam - community |
| cryptogam | <i>Mannia androgyna</i>          | Long 27-2 H 712 (E)       | FJ173790 | - | - | FJ173558 | FJ173700 | NT       | -        | no | Cryptogam - community |
| cryptogam | <i>Mannia androgyna</i>          | Schill 11 (E)             | FJ173791 | - | - | FJ173559 | FJ173701 | NT       | -        | no | Cryptogam - community |
| cryptogam | <i>Mannia androgyna</i>          | Schill 32 (E)             | AM920057 | - | - | AM922080 | AM920276 | FJ173501 | FJ173616 | no | Cryptogam - community |
| cryptogam | <i>Mannia androgyna</i>          | Schill 127 (E)            | AM919995 | - | - | FJ173560 | FJ173702 | NT       | -        | no | Cryptogam - community |
| cryptogam | <i>Mannia californica</i>        | Long 35035, 2a (E)        | AM919997 | - | - | FJ173561 | FJ173703 | FJ173502 | -        | no | Cryptogam - community |
| cryptogam | <i>Mannia californica</i>        | Schill 164 (E)            | AM920042 | - | - | -        | AM920288 | -        | FJ173617 | no | Cryptogam - community |
| cryptogam | <i>Mannia californica</i>        | Schill 102 (E)            | AM920058 | - | - | -        | -        | -        | -        | no | Cryptogam - community |
| cryptogam | <i>Mannia californica</i>        | Long 34281 (E)            | FJ173792 | - | - | FJ173562 | FJ173704 | NT       | -        | no | Cryptogam - community |

|           |                                    |                            |          |   |   |          |          |    |          |    |                       |
|-----------|------------------------------------|----------------------------|----------|---|---|----------|----------|----|----------|----|-----------------------|
| cryptogam | <i>Mannia californica</i>          | Schill 130 (E)             | AM920006 | - | - | FJ173563 | FJ173705 | NT | -        | no | Cryptogam - community |
| cryptogam | <i>Mannia californica</i>          | Schill 144 (E)             | AM920007 | - | - | FJ173564 | FJ173706 | NT | -        | no | Cryptogam - community |
| cryptogam | <i>Mannia californica</i>          | Schill 165 (E)             | AM919993 | - | - | FJ173565 | FJ173707 | NT | -        | no | Cryptogam - community |
| cryptogam | <i>Mannia fragrans</i>             | Schill 51 (E)              | -        | - | - | -        | FJ173708 | NT | -        | no | Cryptogam - community |
| cryptogam | <i>Mannia fragrans</i>             | Schill & Zündorf 3 (E)     | AM920055 | - | - | FJ173566 | FJ173709 | NT | -        | no | Cryptogam - community |
| cryptogam | <i>Mannia fragrans</i>             | Laaka-Lindberg 22-2005 (E) | AM920008 | - | - | FJ173567 | FJ173710 | NT | -        | no | Cryptogam - community |
| cryptogam | <i>Mannia fragrans</i>             | Schill 55 (E)              | AM920018 | - | - | -        | AM920291 | -  | FJ173618 | no | Cryptogam - community |
| cryptogam | <i>Mannia fragrans</i>             | Schill 64 (E)              | FJ173793 | - | - | -        | FJ173711 | NT | -        | no | Cryptogam - community |
| cryptogam | <i>Mannia fragrans</i>             | Schill 59 (E)              | AM919994 | - | - | FJ173568 | FJ173712 | NT | -        | no | Cryptogam - community |
| cryptogam | <i>Mannia pilosa</i>               | Schill 85 (E)              | FJ173794 | - | - | FJ173569 | FJ173713 | NT | -        | no | Cryptogam - community |
| cryptogam | <i>Mannia pilosa</i>               | Schill 84 (E)              | AM920032 | - | - | AM922083 | AM920289 | -  | FJ173619 | no | Cryptogam - community |
| cryptogam | <i>Mannia triandra</i>             | Long & Schill 35668 (E)    | AM920054 | - | - | AM922084 | AM920292 | -  | FJ173620 | no | Cryptogam - community |
| cryptogam | <i>Mannia triandra</i>             | Long & Schill 35677 (E)    | AM920031 | - | - | FJ173570 | FJ173714 | NT | -        | no | Cryptogam - community |
| cryptogam | <i>Plagiochasma appendiculatum</i> | Long 28934 (E)             | FJ173795 | - | - | FJ173571 | FJ173715 | NT | -        | no | Cryptogam - community |
| cryptogam | <i>Plagiochasma cordatum</i>       | Long 35159 (E)             | AM919998 | - | - | FJ173572 | -        | NT | -        | no | Cryptogam - community |
| cryptogam | <i>Plagiochasma crenulatum</i>     | Long 29697 (E)             | AM920027 | - | - | AM922085 | AM920273 | -  | FJ173621 | no | Cryptogam - community |
| cryptogam | <i>Plagiochasma intermedium</i>    | Long 29730 (E)             | AM920025 | - | - | AM922090 | AM920293 | -  | FJ173625 | no | Cryptogam - community |
| cryptogam | <i>Plagiochasma japonicum</i>      | Long 28700 (E)             | AM919990 | - | - | FJ173573 | FJ173716 | NT | -        | no | Cryptogam - community |
| cryptogam | <i>Plagiochasma landii</i>         | Long 29589 (E)             | AM919988 | - | - | FJ173574 | FJ173717 | NT | -        | no | Cryptogam - community |
| cryptogam | <i>Plagiochasma pterospermum</i>   | Long 28578 (E)             | AM920026 | - | - | AM922086 | AM920282 | -  | FJ173622 | no | Cryptogam - community |
| cryptogam | <i>Plagiochasma rupestre</i>       | Long 29674, 4a (E)         | -        | - | - | AM922087 | AM920275 | NT | -        | no | Cryptogam - community |
| cryptogam | <i>Plagiochasma rupestre</i>       | Schill 5 (E)               | AM920000 | - | - | AM922088 | AM920281 | -  | FJ173623 | no | Cryptogam - community |
| cryptogam | <i>Plagiochasma rupestre</i>       | Schill 21 (E)              | AM920028 | - | - | AM922089 | AM920277 | -  | FJ173624 | no | Cryptogam - community |
| cryptogam | <i>Plagiochasma rupestre</i>       | Long 35462 (E)             | FJ173796 | - | - | FJ173575 | FJ173718 | NT | -        | no | Cryptogam - community |
| cryptogam | <i>Plagiochasma wrightii</i>       | Long 29636 (H264) (E)      | FJ173797 | - | - | FJ173576 | FJ173719 | NT | -        | no | Cryptogam - community |



|           |                               |                    |          |     |          |          |          |          |          |    |                       |
|-----------|-------------------------------|--------------------|----------|-----|----------|----------|----------|----------|----------|----|-----------------------|
| cryptogam | <i>Equisetum arvense</i>      | AP400 (OAC)        | -        | -   | -        | EU750645 | EU677106 | -        | -        | no | Cryptogam - community |
| cryptogam | <i>Equisetum arvense</i>      | JAG 0288 (OAC)     | -        | -   | -        | EU750646 | EU677105 | -        | -        | no | Cryptogam - community |
| cryptogam | <i>Equisetum hyemale</i>      | AP344 (OAC)        | -        | -   | EU749487 | -        | EU677110 | -        | -        | no | Cryptogam - community |
| cryptogam | <i>Equisetum hyemale</i>      | JAG 0303 (OAC)     | -        | -   | EU749486 | EU750647 | EU677109 | -        | -        | no | Cryptogam - community |
| cryptogam | <i>Equisetum hyemale</i>      | JAG 0356 (OAC)     | -        | -   | EU749484 | EU750648 | EU677107 | -        | -        | no | Cryptogam - community |
| cryptogam | <i>Equisetum hyemale</i>      | JAG 0390 (OAC)     | -        | -   | EU749485 | EU750649 | EU677108 | -        | -        | no | Cryptogam - community |
| cryptogam | <i>Equisetum palustre</i>     | Chase 11641 (K)    | -        | -   | -        | GQ248297 | GQ248601 | GQ247959 | -        | no | Cryptogam - community |
| cryptogam | <i>Equisetum telmateia</i>    | Chase 11642 (K)    | NT*      | -   | -        | GQ248298 | -        | -        | -        | no | Cryptogam - community |
| cryptogam | <i>Adiantum hispidulum</i>    | USBG 01-0288 (US)  | NT*      | -   | -        | GQ248237 | EF590493 | GQ247896 | -        | no | Cryptogam - community |
| cryptogam | <i>Adiantum venustum</i>      | USBG 00-0037A (US) | NT*      | NT* | -        | GQ248238 | GQ248541 | GQ247897 | -        | no | Cryptogam - community |
| cryptogam | <i>Dryopteris carthusiana</i> | AP188 (OAC)        | -        | -   | -        | EU750635 | EU677094 | EU749703 | EU749943 | no | Cryptogam - community |
| cryptogam | <i>Dryopteris carthusiana</i> | JAG 0115 (OAC)     | EU750396 | -   | -        | EU750637 | EU677096 | EU749705 | EU749945 | no | Cryptogam - community |
| cryptogam | <i>Dryopteris carthusiana</i> | JAG 0142 (OAC)     | EU750395 | -   | -        | EU750636 | EU677095 | EU749704 | EU749944 | no | Cryptogam - community |
| cryptogam | <i>Dryopteris erythosora</i>  | NMNH Kress 06-8357 | -        | -   | -        | EF590692 | EF590524 | -        | -        | no | Cryptogam - community |
| cryptogam | <i>Dryopteris filix-mas</i>   | BM000954784 (BM)   | -        | -   | -        | -        | -        | -        | NT       | no | Cryptogam - community |
| cryptogam | <i>Dryopteris goldiana</i>    | NMNH Kress 06-8356 | -        | -   | -        | EF590693 | EF590525 | -        | -        | no | Cryptogam - community |
| cryptogam | <i>Dryopteris intermedia</i>  | AP323 (OAC)        | EU750400 | -   | -        | EU750638 | EU677100 | EU749709 | EU749946 | no | Cryptogam - community |
| cryptogam | <i>Dryopteris intermedia</i>  | JAG 0187 (OAC)     | EU750399 | -   | -        | -        | EU677099 | EU749708 | EU749947 | no | Cryptogam - community |
| cryptogam | <i>Dryopteris intermedia</i>  | JAG 0256 (OAC)     | EU750398 | -   | -        | EU750639 | EU677098 | EU749707 | EU749948 | no | Cryptogam - community |
| cryptogam | <i>Dryopteris intermedia</i>  | JAG 0340 (OAC)     | EU750397 | -   | -        | EU750640 | EU677097 | EU749706 | EU749949 | no | Cryptogam - community |
| cryptogam | <i>Dryopteris marginalis</i>  | AP327 (OAC)        | EU750403 | -   | -        | EU750641 | EU677103 | EU749712 | EU749950 | no | Cryptogam - community |
| cryptogam | <i>Dryopteris marginalis</i>  | JAG 0249 (OAC)     | EU750401 | -   | -        | EU750642 | EU677101 | EU749710 | EU749951 | no | Cryptogam - community |
| cryptogam | <i>Dryopteris marginalis</i>  | JAG 0404 (OAC)     | EU750402 | -   | -        | EU750644 | EU677102 | EU749711 | -        | no | Cryptogam - community |
| cryptogam | <i>Dryopteris marginalis</i>  | RS150 (OAC)        | EU750404 | -   | -        | EU750644 | EU677104 | EU749713 | EU749952 | no | Cryptogam - community |

legend: NT Not tried, - did not work, "Genbank accession" indicates sequence obtained (FASTA files available on request). Genbank accessions prefixed with GQ are sequences generated from the Guelph sequencing trials. NT\* In a small number of cases in the universality trials, sequences were obtained but analyses showed them to be contaminants. The sequences were removed from the numerator and denominator in calculating sequencing success for Fig 1a. Removing 7 problematic DNAs (six with contaminants at multiple loci, one which failed at all loci), and treating the remainder of singleton-contaminants as failures results in only minor differences to the angiosperm universality results: rpoC1: - 2%, rpoB: no change, matK: - 1%, trnH-psbA: + 2%, rbcL: + 2%, atpF-H: no change, psbK-I: - 1% ).
